# Supplementary material for: Two appealing alternatives for MOFs synthesis: solvent-free oven heating vs. microwave heating
Source: Royal Society of Chemistry journal article supplement (doi:10.1039/c4ra09743b), 2014-01-01
Supplement: c4ra09743b1.pdf [file c4ra09743b1.pdf]

## Supplementary Information for

### **Two appealing alternatives for MOFs synthesis: solvent-free oven heating vs microwave heating**

Mónica Lanchas,<sup>a</sup> Sandra Arcediano,<sup>a</sup> Andrés T. Aguayo,<sup>b</sup> Garikoitz Beobide,<sup>\*a</sup> Oscar Castillo,<sup>\*a</sup>  
Javier Cepeda,<sup>a</sup> Daniel Vallejo-Sánchez<sup>a</sup> and Antonio Luque<sup>a</sup>

<sup>a</sup> *Departamento de Química Inorgánica, Facultad de Ciencia y Tecnología, Universidad del País Vasco, UPV/EHU, Apartado 644, E-48080 Bilbao, Spain and* <sup>b</sup> *Departamento de Ingeniería Química, Facultad de Ciencia y Tecnología, UPV/EHU, Universidad del País Vasco, Apartado 644, E-48080 Bilbao, Spain.*

|                                                                             |           |
|-----------------------------------------------------------------------------|-----------|
| <b>S1. SOLVENT-FREE SYNTHESIS BY OVEN HEATING AND MICROWAVE IRRADIATION</b> | <b>2</b>  |
| <b>S2. THERMOGRAVIMETRIC ANALYSIS AND FTIR SPECTRA</b>                      | <b>10</b> |
| <b>S3. X-RAY POWDER DIFFRACTION ANALYSIS</b>                                | <b>16</b> |
| <b>S4. EFFECT OF THE HEATING RATES AND SOURCE ON SAMPLE CRYSTALLINITY</b>   | <b>21</b> |
| <b>S5. N<sub>2</sub> ADSORPTION EXPERIMENTS</b>                             | <b>32</b> |
| <b>S6. COMPARATIVE BETWEEN SYNTHESIS ROUTE AND SURFACE AREA</b>             | <b>41</b> |

## **S1. SOLVENT-FREE SYNTHESIS BY OVEN HEATING AND MICROWAVE IRRADIATION**

## Chemicals

All the chemicals were of reagent grade and were used as commercially obtained.

## Synthesis

Samples were prepared according to the following general procedure. The corresponding amounts of the metal source ( $\text{Co}(\text{OH})_2$ ,  $\text{Cu}(\text{acetate})_2 \cdot \text{H}_2\text{O}$ ,  $\text{FeCl}_3 \cdot 6\text{H}_2\text{O}$ ,  $\text{Fe}(\text{NO}_3)_3 \cdot 9\text{H}_2\text{O}$ ) and the bridging ligand (2-methylimidazole (mIm) or benzene-1,3,5-tricarboxylic acid (BTC)) were hand-grinded thoroughly to obtain a homogeneous mixture. In the case of the solvent-free synthesis by oven-heating, the final reagent mixture was introduced into a glass ampoule and heated with the thermal processes described in Table S1.1. The glass ampoule was sealed in all cases except for the synthesis of MIL-100(Fe/Cl). Table S1.2 and S1.4 shows the details on the preparation of each sample. Details on the samples prepared by microwave assisted solvent-free synthesis are gathered on Table S1.3 and S.1.5. As microwave source the following conventional household microwave oven was used. In the case of microwave heating, the energy consumption was about 30 and 300 J per gram of product.

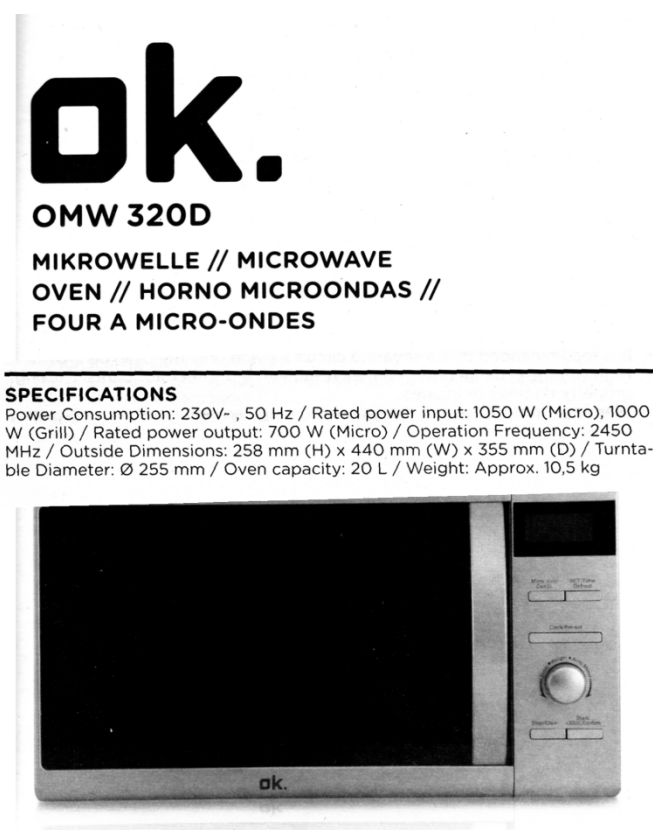

All the products were washed with ethanol to remove unreacted and sequentially characterized by FTIR spectroscopy, thermogravimetric analysis (TGA) and X-ray powder diffraction (XRPD). The reaction yields are based on the metal and, except for ZIF-67, they were calculated from the weight of the dry product (desolvated). As ZIF-67 samples present a minor amount of unreacted and insoluble  $\text{Co}(\text{OH})_2$ , its reaction yields were calculated from the thermogravimetric data, on the

basis of the weight of the final residue and the weight of the metal imidazolate once it has lost all guest molecules.

The identification of the MOF crystal structure was made scrutinizing the Cambridge Structural Database on the basis of the experimental XRPD data of the synthesized samples (for further details see section S3). Effect of the heating rate and microwave irradiation conditions in the crystallinity and microstructural features of synthesized products are discussed in section S4, while details concerning N<sub>2</sub> adsorption experiments and surface area determinations are gathered in section S5.

## **Physical Measurements**

The purity and homogeneity of the polycrystalline samples were checked by elemental analysis, IR spectroscopy, thermogravimetric measurements and X-ray powder diffraction methods. Elemental analyses (C, H, N) were performed on a Euro EA Elemental Analyzer, whereas the metal content determined by a Horiba Yobin Yvon Activa inductively coupled plasma atomic emission spectrometer (ICP-AES). The IR spectra (KBr pellets) were recorded on a FTIR 8400S Shimadzu spectrometer in the 4000–400 cm<sup>-1</sup> spectral region. Thermal analyses (TG/DTA) were performed on a TA Instruments SDT 2960 thermal analyzer in a synthetic air atmosphere (79% N<sub>2</sub> / 21% O<sub>2</sub>) with a heating rate of 5°C min<sup>-1</sup>. The permanent porosity of all samples was studied by means of the measurements of N<sub>2</sub> adsorption isotherms at 77 K using a *Micromeritics* ASAP 2010 analyser. Samples were dried under vacuum at 140 °C and *ca.* 1·10<sup>-4</sup> atm during 6 h prior to measurements.

**Table S1.1.** Employed thermal programs.

| Code     | Thermal program                                                 | Code     | Thermal program                                |
|----------|-----------------------------------------------------------------|----------|------------------------------------------------|
| <b>1</b> | <p>160°C<br/>100°C<br/>RT<br/>30°C<br/>2 h<br/>6 h<br/>12h</p>  | <b>4</b> | <p>120°C<br/>RT<br/>30°C<br/>48 h<br/>s/t</p>  |
| <b>2</b> | <p>160°C<br/>100°C<br/>RT<br/>30°C<br/>2 h<br/>48 h<br/>12h</p> | <b>5</b> | <p>140°C<br/>RT<br/>30°C<br/>28 h<br/>s/t</p>  |
| <b>3</b> | <p>120°C<br/>RT<br/>30°C<br/>24 h<br/>s/t</p>                   | <b>6</b> | <p>160°C<br/>RT<br/>30°C<br/>144 h<br/>12h</p> |

**Table S1.2. Oven-heated solvent-free synthesis:** synthesis conditions, sample code and formulae of the synthesised MOF, yield and corresponding CSD (Cambridge Structural Database) code.<sup>1</sup>

| M:L                              | Synthesis ratio | Reactants                                                                                                                      | Thermal program | Sample code | MOF and Formulae                                                                                                                        | Yield (%) | CSD                 |
|----------------------------------|-----------------|--------------------------------------------------------------------------------------------------------------------------------|-----------------|-------------|-----------------------------------------------------------------------------------------------------------------------------------------|-----------|---------------------|
| <b>Co:mIm</b>                    | 1:2.1           | <i>Co(OH)</i> <sub>2</sub> : 4 mmol (0.3914 g)<br><i>mIm</i> : 8.4 mmol (0.6966 g)                                             | 1               | ZIF67-OH1   | ZIF-67                                                                                                                                  | 89.4      | GITTOT01            |
|                                  |                 |                                                                                                                                | 2               | ZIF67-OH2   | [Co(mIm) <sub>2</sub> ] <sub>n</sub>                                                                                                    | 91.7      |                     |
| <b>Cu:BTC</b>                    | 3:2             | <i>Cu(acetate)</i> <sub>2</sub> : 3 mmol (0.6050 g)<br><i>BTC</i> : 2 mmol (0.4424 g)                                          | 3               | MOF199-OH1  | MOF-199                                                                                                                                 | 89.0      | UVIPIZ              |
|                                  |                 |                                                                                                                                | 4               | MOF199-OH2  | [Cu <sub>3</sub> (μ <sub>6</sub> -BTC) <sub>2</sub> (OH <sub>2</sub> ) <sub>3</sub> ] <sub>n</sub>                                      | 99.3      |                     |
| <b>Fe:BTC</b>                    | 3:2             | <i>FeCl</i> <sub>3</sub> : 3 mmol (0.8110 g)<br><i>BTC</i> : 2 mmol (0.4424 g)                                                 | 3               | MIL-C-OH1   | MIL-100(Fe/Cl)                                                                                                                          | 40.3      | CIGXIA <sup>2</sup> |
|                                  |                 |                                                                                                                                | 4               | MIL-C-OH2   |                                                                                                                                         | 34.4      |                     |
|                                  |                 |                                                                                                                                | 5               | MIL-C-OH3   | 48.4                                                                                                                                    |           |                     |
|                                  |                 |                                                                                                                                | 7               | MIL-C-OH4   | [Fe <sub>3</sub> (μ <sub>3</sub> -O)(μ <sub>6</sub> -BTC) <sub>2</sub> Cl(OH <sub>2</sub> ) <sub>2</sub> ] <sub>n</sub>                 | 78.9      |                     |
|                                  |                 |                                                                                                                                | 8               | MIL-C-OH6   | 66.3                                                                                                                                    |           |                     |
| <b>Fe:BTC</b>                    | 3:2             | <i>Fe(NO<sub>3</sub>)<sub>3</sub></i> : 3 mmol (1.2367 g)<br><i>BTC</i> : 2 mmol (0.4424 g)                                    | 3               | MIL-N-OH1   | MIL-100(Fe/NO <sub>3</sub> )                                                                                                            | 42.0      | CIGXIA <sup>2</sup> |
|                                  |                 |                                                                                                                                | 4               | MIL-N-OH2   |                                                                                                                                         | 52.2      |                     |
|                                  |                 |                                                                                                                                | 5               | MIL-N-OH3   | 91.4                                                                                                                                    |           |                     |
|                                  |                 |                                                                                                                                | 7               | MIL-N-OH4   | [Fe <sub>3</sub> (μ <sub>3</sub> -O)(μ <sub>6</sub> -BTC) <sub>2</sub> (NO <sub>3</sub> )(OH <sub>2</sub> ) <sub>2</sub> ] <sub>n</sub> | 82.0      |                     |
|                                  |                 |                                                                                                                                | 8               | MIL-N-OH6   | 75.1                                                                                                                                    |           |                     |
| <b>Co:Propionic acid:Adenine</b> | 1:3.4:1         | <i>Co(OH)</i> <sub>2</sub> : 8 mmol (0.7827 g)<br><i>Propionic acid</i> : 27 mmol (2.0 mL)<br><i>Adenine</i> : 8 mmo (1.092 g) | 6               | MBioF-OH1   | MBioF-12<br>[Co(μ-propionate)(μ <sub>3</sub> -adeninate)] <sub>n</sub>                                                                  | 90.1      | BEYSEF              |

<sup>1</sup>: *mIm*: 2-methylimidazole; *BTC*: *benzene-1,3,5-tricarboxylic acid*.

<sup>2</sup> CIGXIA: it corresponds to MIL-100(Fe/F) with formula [Fe<sub>3</sub>(μ<sub>3</sub>-O)(μ<sub>6</sub>-BTC)<sub>2</sub>F(OH<sub>2</sub>)<sub>2</sub>]<sub>n</sub>.

**Table S1.3. Microwave assisted solvent-free synthesis:** synthesis conditions, sample code and formulae of the synthesised MOF, yield and corresponding CSD (Cambridge Structural Database) code.<sup>1</sup>

| M:L                                          | Synthesis ratio | Reactants                                                                                                                      | Microwave irradiation | Sample code | MOF and Formulae                                                                                                                                                        | Yield (%) | CSD                 |
|----------------------------------------------|-----------------|--------------------------------------------------------------------------------------------------------------------------------|-----------------------|-------------|-------------------------------------------------------------------------------------------------------------------------------------------------------------------------|-----------|---------------------|
| <b>Co:mIm</b>                                | 1:2.1           | <i>Co(OH)<sub>2</sub></i> : 4 mmol (0.3914 g)<br><i>mIm</i> : 8.4 mmol (0.6966 g)                                              | 6 min, 100%           | ZIF67-MW1   | ZIF-67<br>[Co(mIm) <sub>2</sub> ] <sub>n</sub>                                                                                                                          | 89.8      | GITTOT01            |
|                                              |                 |                                                                                                                                | 7.5 min, 80%          | ZIF67-MW2   |                                                                                                                                                                         | 91.3      |                     |
|                                              |                 |                                                                                                                                | 12 min, 50%           | ZIF67-MW3   |                                                                                                                                                                         | 88.3      |                     |
|                                              |                 |                                                                                                                                | 20 min, 30%           | ZIF67-MW4   |                                                                                                                                                                         | 89.6      |                     |
| <b>Cu:BTC</b>                                | 3:2             | <i>Cu(acetate)<sub>2</sub></i> : 3 mmol (0.6050 g)<br><i>BTC</i> : 2 mmol (0.4424 g)                                           | 6 min, 100%           | MOF199-MW1  | MOF-199<br>[Cu <sub>3</sub> (μ <sub>6</sub> -BTC) <sub>2</sub> (OH <sub>2</sub> ) <sub>3</sub> ] <sub>n</sub>                                                           | 97.1      | UUIPIZ              |
|                                              |                 |                                                                                                                                | 7.5 min, 80%          | MOF199-MW2  |                                                                                                                                                                         | 88.8      |                     |
|                                              |                 |                                                                                                                                | 12 min, 50%           | MOF199-MW3  |                                                                                                                                                                         | 96.8      |                     |
|                                              |                 |                                                                                                                                | 20 min, 30%           | MOF199-MW4  |                                                                                                                                                                         | 97.3      |                     |
| <b>Fe:BTC</b>                                | 3:2             | <i>FeCl<sub>3</sub></i> : 3 mmol (0.8110 g)<br><i>BTC</i> : 2 mmol (0.4424 g)                                                  | 0.8 min, 100%         | MIL-C-MW1   | MIL-100(Fe/Cl)<br>[Fe <sub>3</sub> (μ <sub>3</sub> -O)(μ <sub>6</sub> -BTC) <sub>2</sub> Cl(OH <sub>2</sub> ) <sub>2</sub> ] <sub>n</sub>                               | 23.5      | CIGXIA <sup>2</sup> |
|                                              |                 |                                                                                                                                | 1.0 min, 80%          | MIL-C-MW2   |                                                                                                                                                                         | 17.2      |                     |
|                                              |                 |                                                                                                                                | 1.6 min, 50%          | MIL-C-MW3   |                                                                                                                                                                         | 40.7      |                     |
|                                              |                 |                                                                                                                                | 2.7 min, 30%          | MIL-C-MW4   |                                                                                                                                                                         | 25.9      |                     |
|                                              |                 |                                                                                                                                | 3 min, 50%            | MIL-C-MW5   |                                                                                                                                                                         | 80.1      |                     |
|                                              |                 |                                                                                                                                | 4 min, 30%            | MIL-C-MW6   |                                                                                                                                                                         | 77.2      |                     |
| <b>Fe:BTC</b>                                | 3:2             | <i>Fe(NO<sub>3</sub>)<sub>3</sub></i> : 3 mmol (1.2367 g)<br><i>BTC</i> : 2 mmol (0.4424 g)                                    | 0.8 min, 100%         | MIL-N-MW1   | MIL-100(Fe/NO <sub>3</sub> )<br>[Fe <sub>3</sub> (μ <sub>3</sub> -O)(μ <sub>6</sub> -BTC) <sub>2</sub> (NO <sub>3</sub> )(OH <sub>2</sub> ) <sub>2</sub> ] <sub>n</sub> | 57.2      | CIGXIA <sup>2</sup> |
|                                              |                 |                                                                                                                                | 1.0 min, 80%          | MIL-N-MW2   |                                                                                                                                                                         | 31.4      |                     |
|                                              |                 |                                                                                                                                | 1.6 min, 50%          | MIL-N-MW3   |                                                                                                                                                                         | 51.8      |                     |
|                                              |                 |                                                                                                                                | 2.7 min, 30%          | MIL-N-MW4   |                                                                                                                                                                         | 71.0      |                     |
|                                              |                 |                                                                                                                                | 3 min, 50%            | MIL-N-MW5   |                                                                                                                                                                         | 82.2      |                     |
|                                              |                 |                                                                                                                                | 4 min, 30%            | MIL-N-MW6   |                                                                                                                                                                         | 82.9      |                     |
| <b>Co:Propionic acid:Adenine<sup>1</sup></b> | 1:3.4:1         | <i>Co(OH)<sub>2</sub></i> : 8 mmol (0.7827 g)<br><i>Propionic acid</i> : 27 mmol (2.0 mL)<br><i>Adenine</i> : 8 mmol (1.092 g) | 6 min, 100%           | MBioF-MW1   | MBioF-12<br>[Co(μ-propionate)(μ <sub>3</sub> -adeninate)] <sub>n</sub>                                                                                                  | 89.8      | BEYSEF              |
|                                              |                 |                                                                                                                                | 7.5 min, 80%          | MBioF -MW2  |                                                                                                                                                                         | 91.3      |                     |
|                                              |                 |                                                                                                                                | 12 min, 50%           | MBioF -MW3  |                                                                                                                                                                         | 88.3      |                     |
|                                              |                 |                                                                                                                                | 20 min, 30%           | MBioF -MW4  |                                                                                                                                                                         | 89.6      |                     |

<sup>1</sup> The excess of propionic acid accounts for the propionic acid that goes to the gas-phase.

**Table S1.4. Oven heating solvent-free synthesis of MIL-N-OH and MIL-C-OH with an stoichiometric amount of NaOH:** synthesis conditions, sample code and formulae of the synthesised MOF, yield and corresponding CSD (Cambridge Structural Database) code.<sup>1</sup>

| M:L           | Synthesis ratio | Reactants                                                                                                                         | Thermal program | Sample code | MOF and Formulae                                                                                                                                                            | Yield (%) | CSD                 |
|---------------|-----------------|-----------------------------------------------------------------------------------------------------------------------------------|-----------------|-------------|-----------------------------------------------------------------------------------------------------------------------------------------------------------------------------|-----------|---------------------|
| <b>Fe:BTC</b> | 3:2:3           | <i>FeCl</i> <sub>3</sub> : 3 mmol (0.8110 g)<br><i>BTC</i> : 2 mmol (0.4424 g)<br><i>NaOH</i> : 3 mmol (0.1237 g)                 | 7               | MIL-C-OH5   | MIL-100(Fe/Cl)<br><br>[Fe <sub>3</sub> (μ <sub>3</sub> -O)(μ <sub>6</sub> -BTC) <sub>2</sub> Cl(OH <sub>2</sub> ) <sub>2</sub> ] <sub>n</sub>                               | 62.2      | CIGXIA <sup>2</sup> |
| <b>Fe:BTC</b> | 3:2:3           | <i>Fe(NO</i> <sub>3</sub> ) <sub>3</sub> : 3 mmol (1.2367 g)<br><i>BTC</i> : 2 mmol (0.4424 g)<br><i>NaOH</i> : 3 mmol (0.1237 g) | 7               | MIL-C-OH5   | MIL-100(Fe/NO <sub>3</sub> )<br><br>[Fe <sub>3</sub> (μ <sub>3</sub> -O)(μ <sub>6</sub> -BTC) <sub>2</sub> (NO <sub>3</sub> )(OH <sub>2</sub> ) <sub>2</sub> ] <sub>n</sub> | 99.1      | CIGXIA <sup>2</sup> |



**Table S1.5. Microwave assisted solvent-free synthesis of MIL-N-MW with an stoichiometric amount of NaOH:** synthesis conditions, sample code and formulae of the synthesised MOF, yield and corresponding CSD (Cambridge Structural Database) code.<sup>1</sup>

| M:L:NaOH           | Synthesis ratio | Reactants                                                                                                                      | Microwave irradiation | Sample code | MOF and Formulae                                                                                                                        | Yield (%) | CSD                 |
|--------------------|-----------------|--------------------------------------------------------------------------------------------------------------------------------|-----------------------|-------------|-----------------------------------------------------------------------------------------------------------------------------------------|-----------|---------------------|
|                    |                 |                                                                                                                                | 0.8 min, 100%         | MIL-N-MW1'  |                                                                                                                                         | 60.0      |                     |
| <b>Fe:BTC:NaOH</b> | 3:2:3           | <i>Fe(NO<sub>3</sub>)<sub>3</sub></i> : 3 mmol (1.2367 g)<br><i>BTC</i> : 2 mmol (0.4424 g)<br><i>NaOH</i> : 3 mmol (0.1237 g) | 1.0 min, 80%          | MIL-N-MW2'  | MIL-100(Fe/NO <sub>3</sub> )                                                                                                            | 54.3      | CIGXIA <sup>2</sup> |
|                    |                 |                                                                                                                                | 1.6 min, 50%          | MIL-N-MW3'  | [Fe <sub>3</sub> (μ <sub>3</sub> -O)(μ <sub>6</sub> -BTC) <sub>2</sub> (NO <sub>3</sub> )(OH <sub>2</sub> ) <sub>2</sub> ] <sub>n</sub> | 50.3      |                     |
|                    |                 |                                                                                                                                | 2.7 min, 30%          | MIL-N-MW4'  |                                                                                                                                         | 78.4      |                     |

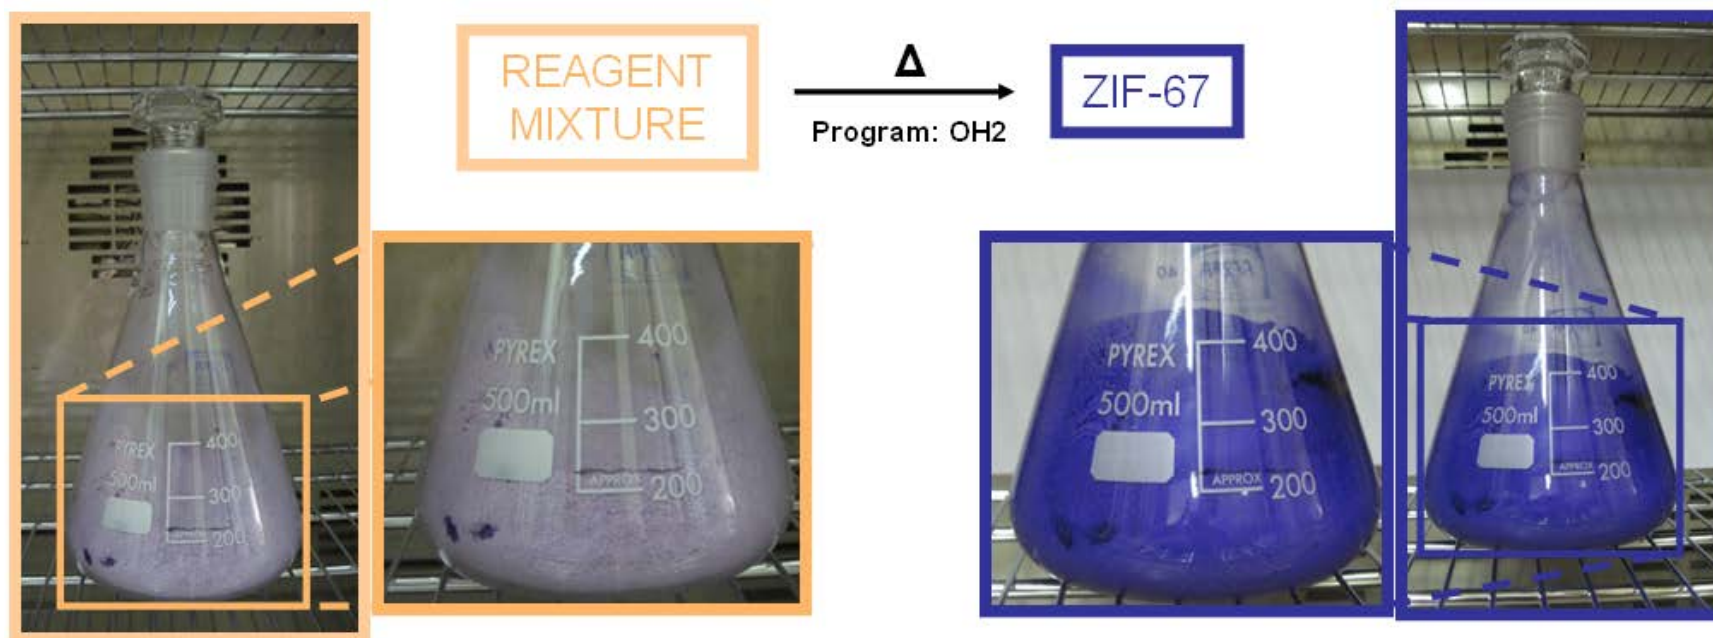

**Figure S1.1.** Scale up (200g) synthesis of ZIF-67 (ZIF67-OH2). Notice the volume and colour change.

## **S2. THERMOGRAVIMETRIC ANALYSIS AND FTIR SPECTRA**

TGA measurements and FTIR spectra of representative samples are shown in Figures S2.1 and S2.2, respectively. The results of the thermogravimetric analyses and main FTIR bands gathered in Table S2.1.

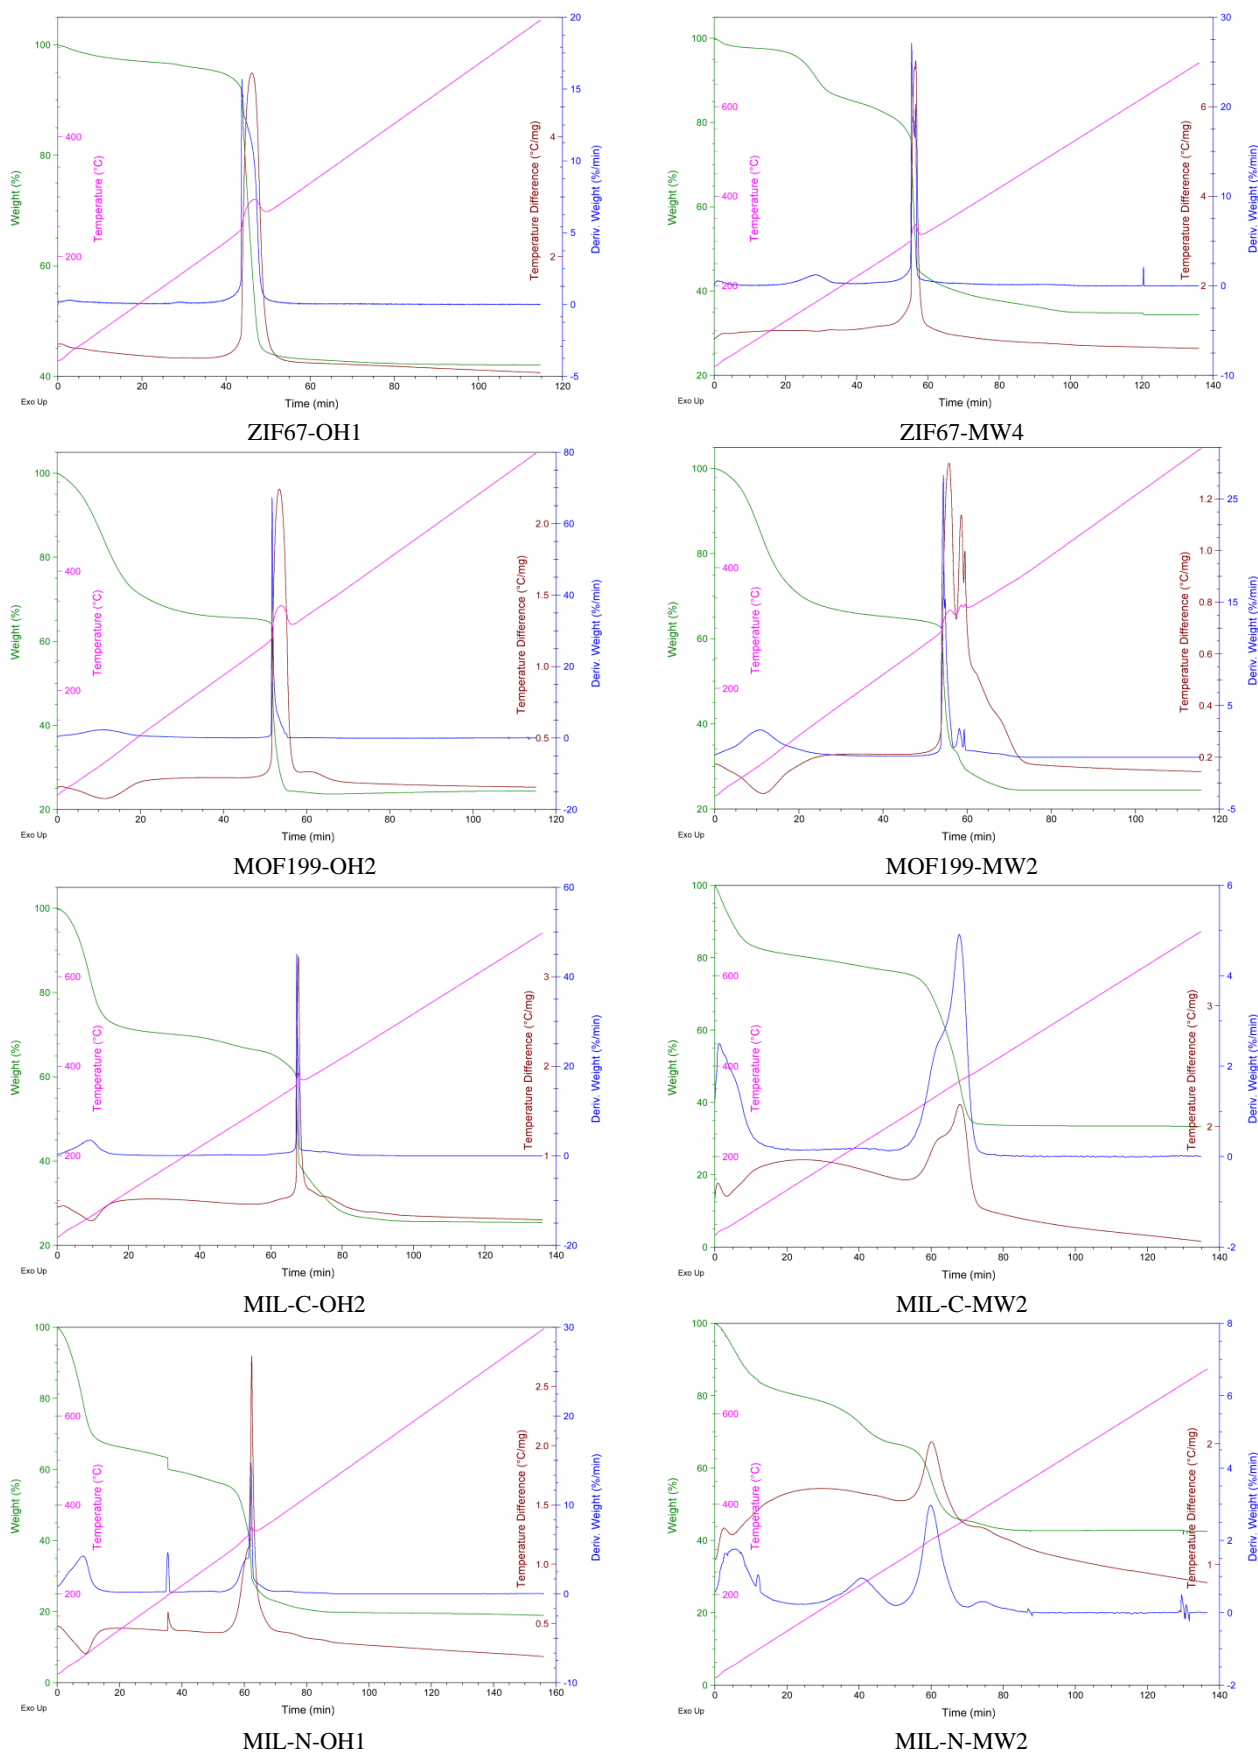

**Figure S2.1.** Thermogravimetric measurements performed upon representative samples.

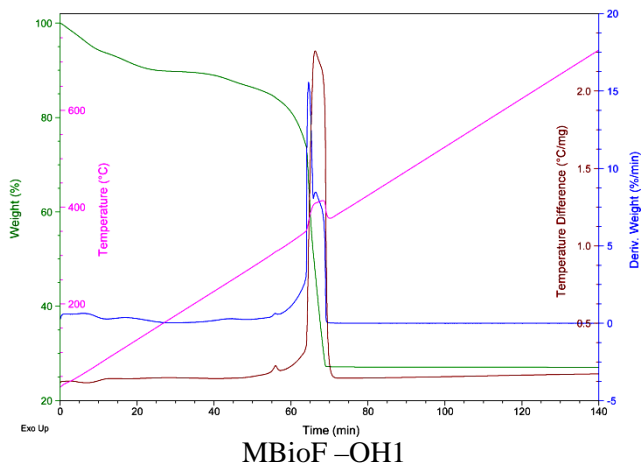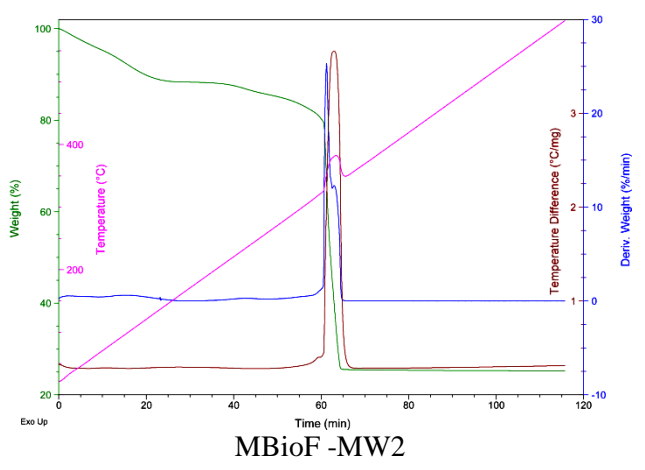

**Figure S2.1 (cont.).** Thermogravimetric measurements performed upon representative samples.

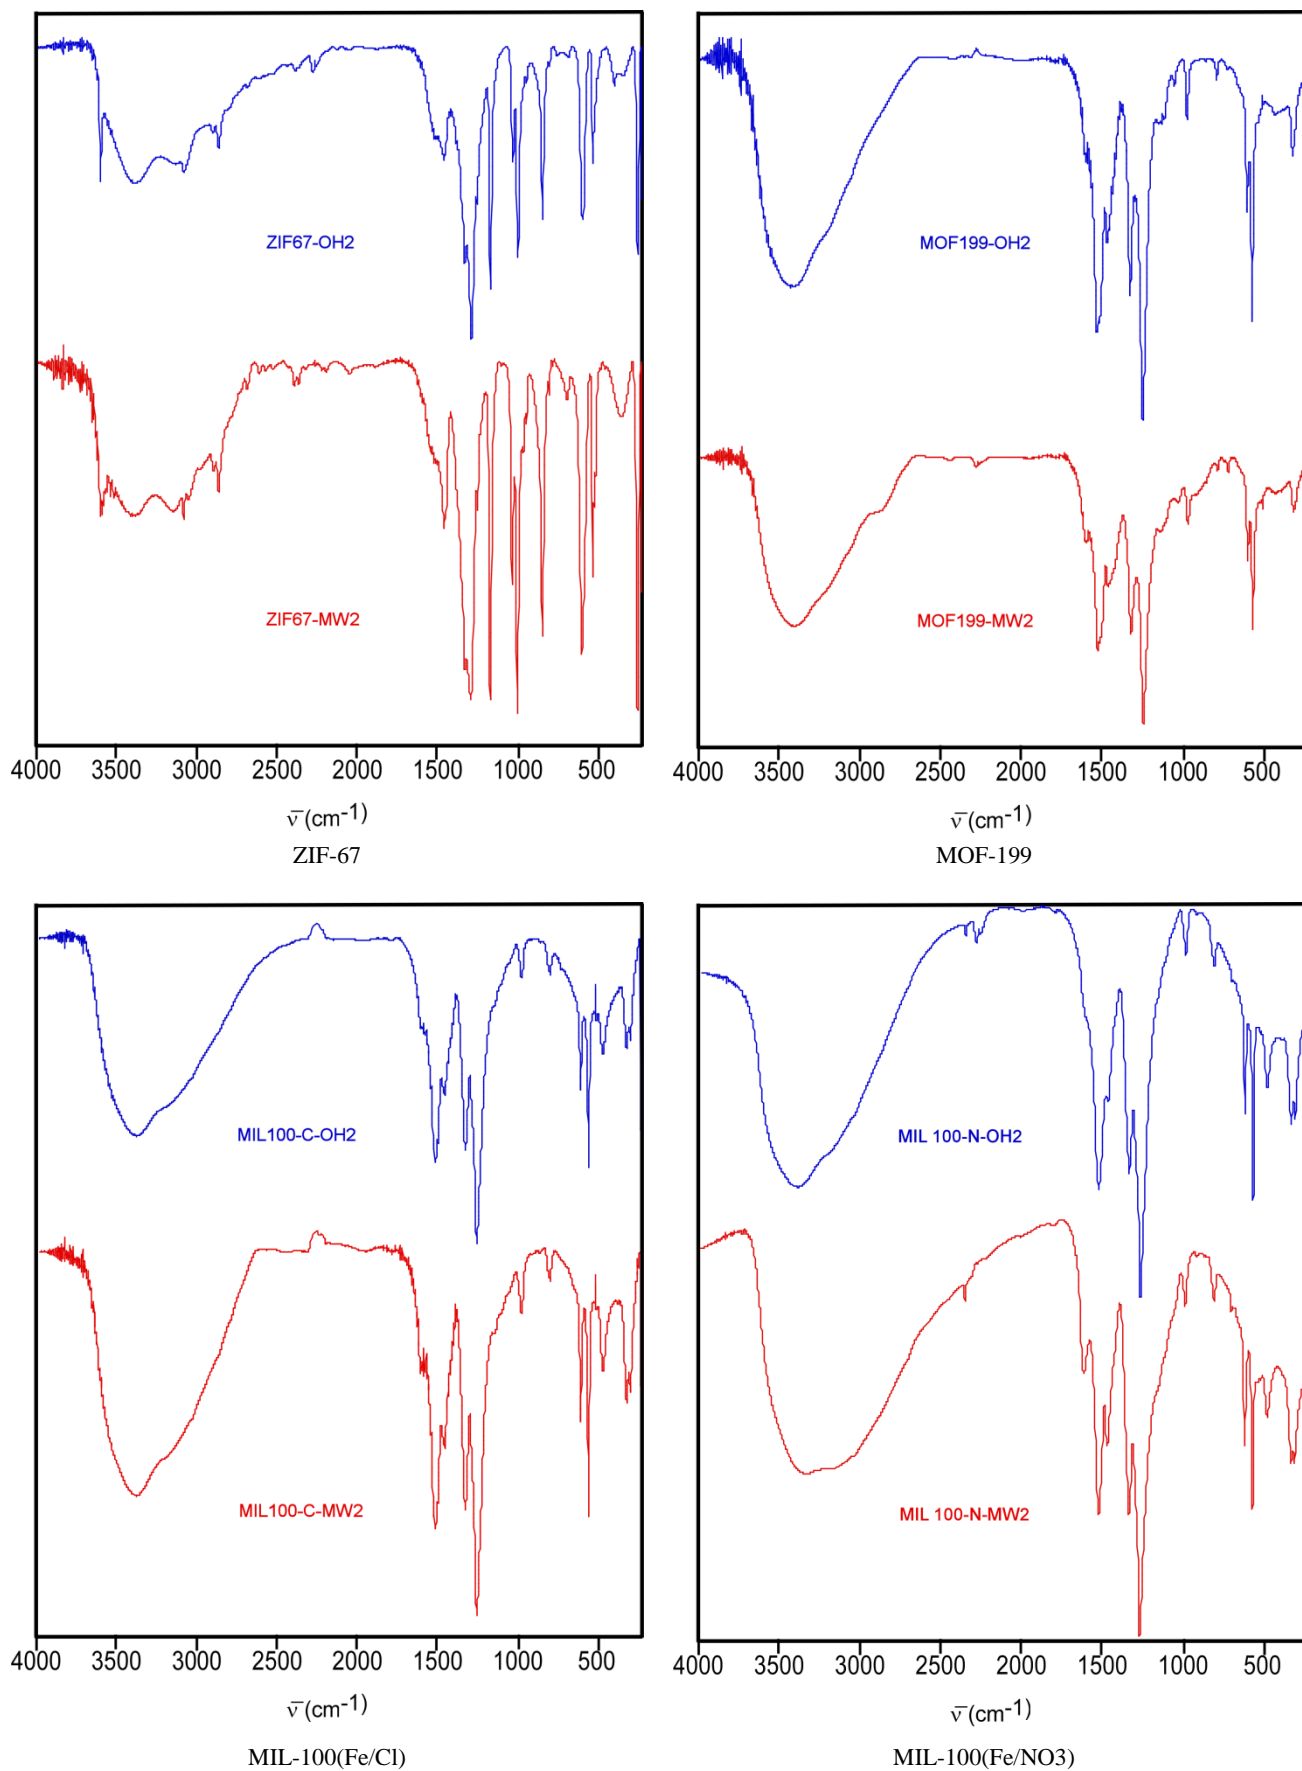

**Figure S2.2.** FTIR spectra performed upon representative samples.

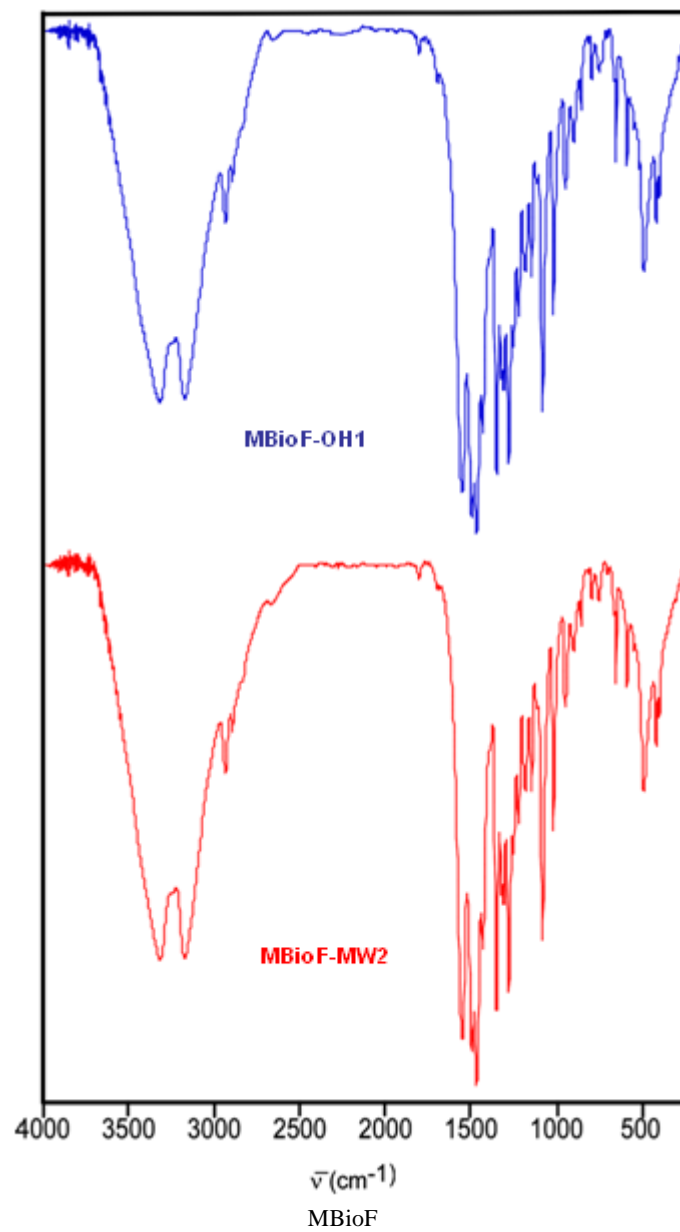

**Figure S2.2 (cont.).** FTIR spectra performed upon representative samples.

**Table S2.1.** Results of the thermogravimetric analyses and main FTIR bands for each sample.<sup>a</sup>

| MOF                           | Formula                                                                                                                                                                           | Sample     | Residue of the thermogravimetry                                            | Main FTIR bands (cm <sup>-1</sup> , KBr pellets)                                                                                                                                                                                                                                                                            |
|-------------------------------|-----------------------------------------------------------------------------------------------------------------------------------------------------------------------------------|------------|----------------------------------------------------------------------------|-----------------------------------------------------------------------------------------------------------------------------------------------------------------------------------------------------------------------------------------------------------------------------------------------------------------------------|
| ZIF-67                        | [Co(mIm) <sub>2</sub> ] <sub>n</sub>                                                                                                                                              | ZIF67-OH2  | Residue: Co <sub>3</sub> O <sub>4</sub><br>Calcd.: 28.26%<br>Found: 35.25% | 3421 (m), 3130 (m), 2962 (w), 2924 (w), 1633 (sh), 1578 (m), 1507 (w), 1454 (s), 1414 (vs), 1383 (m), 1303 (s), 1172 (m), 1139 (s), 1087 (w), 992 (m), 950 (w), 835 (w), 750 (m), 692 (m), 683 (sh), 561 (w) 507 (sh), 425 (s).                                                                                             |
|                               | [Co(C <sub>4</sub> H <sub>5</sub> N <sub>2</sub> ) <sub>2</sub> ] <sub>n</sub>                                                                                                    | ZIF67-MW1  | Residue: Co <sub>3</sub> O <sub>4</sub><br>Calcd.: 28.29%<br>Found: 36.32% | 3625 (m), 3444 (m), 3201 (m), 3132 (m), 3104 (sh), 2958 (w), 2923 (m), 2757 (w), 2472 (w), 2444 (w), 1580 (m), 1420 (vs), 1310 (vs), 1172(s), 1144 (vs), 994 (s), 755 (s), 694(m), 422 (vs).                                                                                                                                |
| MOF-199                       | [Cu <sub>3</sub> (μ <sub>6</sub> -BTC) <sub>2</sub> (OH <sub>2</sub> ) <sub>3</sub> ] <sub>n</sub>                                                                                | MOF199-OH2 | Residue: CuO<br>Calcd.: 25.92%<br>Found: 24.37%                            | 3440 (s), 1710 (w), 1640 (s), 1580 (m), 1450 (s), 1370 (vs), 1270 (w), 1180 (w), 1110 (w), 940 (w), 870 (w), 760 (m), 720 (s), 670 (w), 590 (w), 490 (m).                                                                                                                                                                   |
|                               | [Cu <sub>3</sub> (μ <sub>6</sub> -C <sub>9</sub> H <sub>3</sub> O <sub>6</sub> ) <sub>2</sub> (OH <sub>2</sub> ) <sub>3</sub> ] <sub>n</sub>                                      | MOF199-MW2 | Residue: CuO<br>Calcd.: 25.43%<br>Found: 24.46%                            | 3436 (s), 1710 (w), 1640 (s), 1580 (m), 1450 (s), 1374 (vs), 1270 (sh), 1110 (w), 940 (w), 870 (w), 760 (m), 730(s), 660 (w), 590 (w), 491 (w).                                                                                                                                                                             |
| MIL-100 (Fe/Cl)               | [Fe <sub>3</sub> (μ <sub>3</sub> -O)(μ <sub>6</sub> -BTC) <sub>2</sub> Cl(OH <sub>2</sub> ) <sub>2</sub> ] <sub>n</sub>                                                           | MIL-C-OH2  | Residue: Fe <sub>2</sub> O <sub>3</sub><br>Calcd.: 25.10%<br>Found: 25.60% | 3420 (s), 1628 (s), 1580(sh), 1450(s), 1380(vs), 1120 (w), 950 (w), 760 (m), 720 (s), 625 (m), 485 (m), 462 (m).                                                                                                                                                                                                            |
|                               | [Fe <sub>3</sub> (μ <sub>3</sub> -O)(μ <sub>6</sub> -C <sub>9</sub> H <sub>3</sub> O <sub>6</sub> ) <sub>2</sub> Cl(OH <sub>2</sub> ) <sub>2</sub> ] <sub>n</sub>                 | MIL-C-MW2  | Residue: Fe <sub>2</sub> O <sub>3</sub><br>Calcd.: 26.19%<br>Found: 29.63% | 3420 (s), 1716 (sh), 1633 (s), 1580 (m), 1450 (s), 1381 (vs), 1114 (w), 943 (w), 758 (m), 711 (s), 627 (m), 486 (m), 461 (m).                                                                                                                                                                                               |
| MIL-100 (Fe/NO <sub>3</sub> ) | [Fe <sub>3</sub> (μ <sub>3</sub> -O)(μ <sub>6</sub> -BTC) <sub>2</sub> (NO <sub>3</sub> )(OH <sub>2</sub> ) <sub>2</sub> ] <sub>n</sub>                                           | MIL-N-OH2  | Residue: Fe <sub>2</sub> O <sub>3</sub><br>Calcd.: 22.67%<br>Found: 19.62% | 3431 (s), 2421 (sh), 2357 (w), 1631 (s), 1576 (sh), 1553 (s), 1380 (vs), 1113 (w), 942 (w), 759 (m), 709 (s), 628 (m), 488 (m), 462 (m).                                                                                                                                                                                    |
|                               | [Fe <sub>3</sub> (μ <sub>3</sub> -O)(μ <sub>6</sub> -C <sub>9</sub> H <sub>3</sub> O <sub>6</sub> ) <sub>2</sub> (NO <sub>3</sub> )(OH <sub>2</sub> ) <sub>2</sub> ] <sub>n</sub> | MIL-N-MW4' | Residue: Fe <sub>2</sub> O <sub>3</sub><br>Calcd.: 27.48%<br>Found: 25.72% | 3379 (s), 1716 (w), 1621 (s), 1579 (m), 1442 (s), 1379 (vs), 1113 (w), 939 (w), 757 (m), 709 (s), 624 (w), 484 (m), 459 (m).                                                                                                                                                                                                |
| MBioF-12                      | [Co <sub>2</sub> (μ <sub>3</sub> -propionato) <sub>2</sub> (μ-adeninato) <sub>2</sub> ] <sub>n</sub>                                                                              | MOF-12-OH1 | Residue: Co <sub>3</sub> O <sub>4</sub><br>Calcd.: 28.26%<br>Found: 28.07% | 3350(s), 3200(s), 2990(m), 2940(m), 1797(w), 1658 (vs), 1605(vs)□<br>1578(vs),1542(s), 1464(s), 1439(s), 1425(s),1397(s), 1371(s), 1342(m), 1314(sh), 1304(m), 1271(m), 1242(m), 1210(s), 1149(m), 1082(m), 1033(w), 994(w), 953(w), 934(w), 895(w), 877(w), 798(m), 737(m), 712(m), 699(m), 667(m), 642(m), 574(m), 555(m) |
|                               | [Co <sub>2</sub> (μ <sub>3</sub> -C <sub>5</sub> H <sub>5</sub> N <sub>5</sub> ) <sub>2</sub> (μ-C <sub>3</sub> H <sub>5</sub> O <sub>2</sub> ) <sub>2</sub> ] <sub>n</sub>       | MOF-12-MW3 | Residue: Co <sub>3</sub> O <sub>4</sub><br>Calcd.: 28.29%<br>Found: 25.72% | 3340(s), 3208(s), 2979(m), 2937(m), 1797(w), 1658 (vs), 1603(vs)□<br>1578(vs),1542(s), 1464(s), 1439(s), 1425(s),1397(s), 1372(s), 1342(m), 1314(sh), 1306(m), 1269(m), 1242(m), 1207(s), 1149(m), 1079(m), 1032(w), 993(w), 950(w), 935(w), 896(w), 849(w), 799(m), 737(m), 712(m), 697(m), 643(m), 573(m), 554(m)         |

<sup>a</sup>: calculated residue was obtained by assigning the mass value after the solvent removal to the formula of the activated MOF (i.e. calculated residue is obtained on the basis of the activated MOF formula and the mass after the removal of the solvent captured during the sample washing or adsorbed humidity. As the experimental mass percentage is different at this point, the calculated residue differs from one sample to another).

### **S3. X-RAY POWDER DIFFRACTION ANALYSIS**



The X-ray powder diffraction (XRPD) patterns were collected on a Phillips X'PERT powder diffractometer with Cu-K $\alpha$  radiation ( $\lambda = 1.5418 \text{ \AA}$ ) over the range  $5 < 2\theta < 70$  with a step size of  $0.02^\circ$  and an acquisition time of 2.5 s per step at  $20^\circ\text{C}$ . Indexation of the diffraction profiles was made by means of the FULLPROF program (pattern-matching analysis)<sup>1</sup> on the basis of the space group and the cell parameters found in the *Cambridge Structural Database (CSD)* for the MOFs (elucidated by single crystal X-ray diffraction) and found in the *Inorganic Crystal Structure Database (ICSD)* for the corresponding metal hydroxide precursor. The calculated and observed diffraction patterns are shown in Figures S3.1-S3.3.

Reliability factors of the pattern-matching are calculated according to:  $R_f = \frac{\sum (|I_{\text{obs}}|^{1/2} - |I_{\text{calc}}|^{1/2})}{\sum |I_{\text{obs}}|^{1/2}}$ .  $R_b = \frac{\sum |I_{\text{obs}} - I_{\text{calc}}|}{\sum I_{\text{obs}}}$ .  $R_p = \frac{\sum |y_{\text{obs}} - y_{\text{calc}}|}{\sum y_{\text{obs}}}$ .  $R_{wp} = \frac{[\sum \omega_i |y_{\text{obs}} - y_{\text{calc}}|^2 / \sum \omega_i (y_{\text{obs}})^2]^{1/2}}$ .

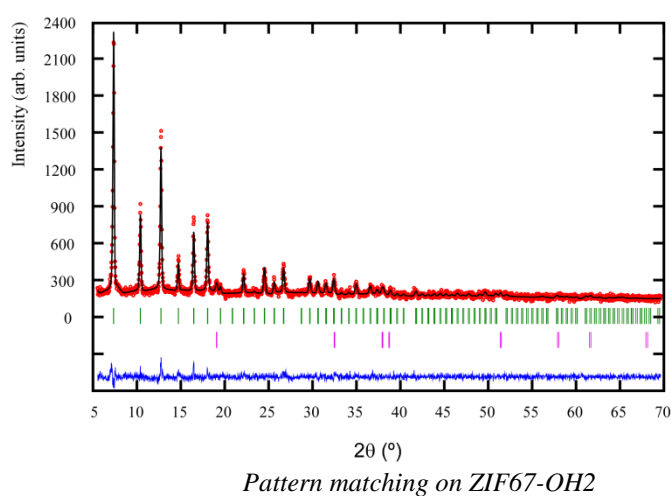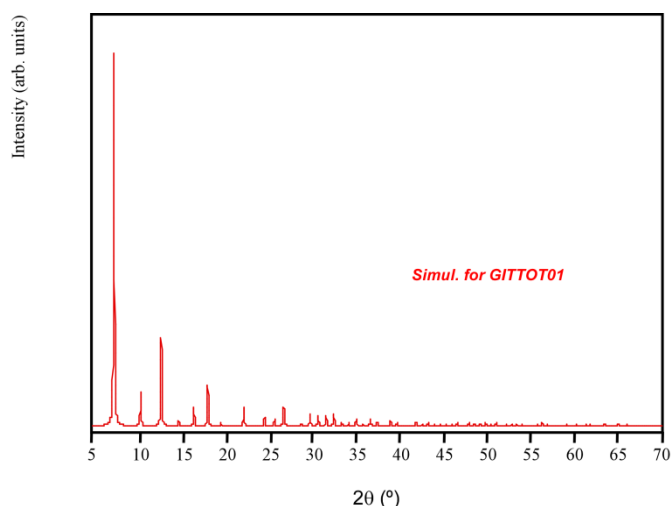

| GITTOT01         |            |
|------------------|------------|
| Crystal System   | Cubic      |
| Space group      | I-43m      |
| a (Å)            | 16.9589(3) |
| b (Å)            | 16.9589(3) |
| c (Å)            | 16.9589(3) |
| $\alpha$ (°)     | 90.00      |
| $\beta$ (°)      | 90.00      |
| $\gamma$ (°)     | 90.00      |
| Fitting data     |            |
| 2 $\theta$ range | 5–70°      |
| $\Delta 2\theta$ | 0.026°     |
| R <sub>f</sub>   | 5.30       |
| R <sub>b</sub>   | 1.97       |
| R <sub>p</sub>   | 6.01       |
| R <sub>wp</sub>  | 7.58       |
| $\chi^2$         | 1.23       |

**Figure S3.1.** Left-up: pattern-matching refinement on ZIF67-OH2 (green ticks: calculated reflections of GITTOT01 phase; pink ticks: calculated reflections of Co(OH)<sub>2</sub>). Left-down: simulated PXRD pattern of GITTOT01. Right: Crystal structure data and pattern-matching refinement data.

<sup>1</sup> (a) Rodríguez-Carvajal, J. *FULLPROF, Program Rietveld for Pattern Matching Analysis of Powder Patterns*, Abstracts of the Satellite Meeting on Powder Diffraction of the XV Congress of the IUCr, Toulouse, Francia, **1990**, 127. (b) Rodríguez-Carvajal, J.: *FULLPROF 2000*, version 2.5d, Laboratoire Léon Brillouin (CEA-CNRS), Centre d'Études de Saclay, Gif sur Yvette Cedex, Francia, **2003**.

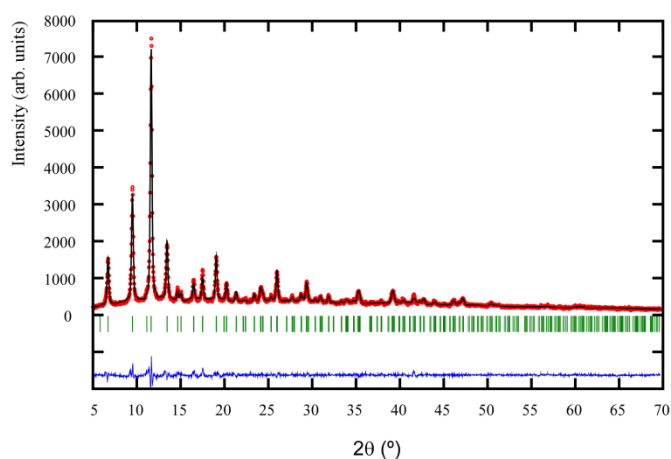

Pattern matching on MOF199-OH2

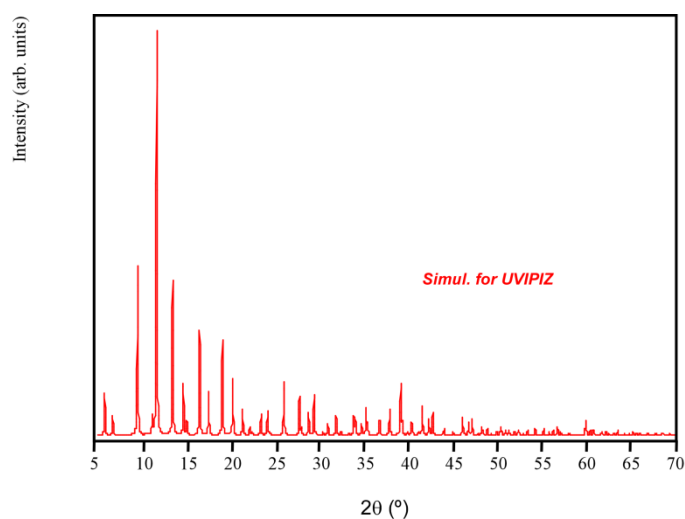

| UVIPIZ           |             |
|------------------|-------------|
| Crystal System   | Cubic       |
| Space group      | F m-3m      |
| a (Å)            | 26.36053(7) |
| b (Å)            | 26.36053(7) |
| c (Å)            | 26.36053(7) |
| $\alpha$ (°)     | 90.00       |
| $\beta$ (°)      | 90.00       |
| $\gamma$ (°)     | 90.00       |
| Fitting data     |             |
| 2 $\theta$ range | 5–70°       |
| $\Delta 2\theta$ | 0.026°      |
| Rf               | 1.60        |
| Rb               | 0.76        |
| Rp               | 5.23        |
| Rwp              | 6.73        |
| $\chi^2$         | 1.92        |

**Figure S3.2.** *Left-up:* pattern-matching refinement on MOF199-OH2 (green ticks: calculated reflections of UVIPIZ phase). *Left-down:* simulated PXRD pattern of UVIPIZ. *Right:* Crystal structure data and pattern-matching refinement data.

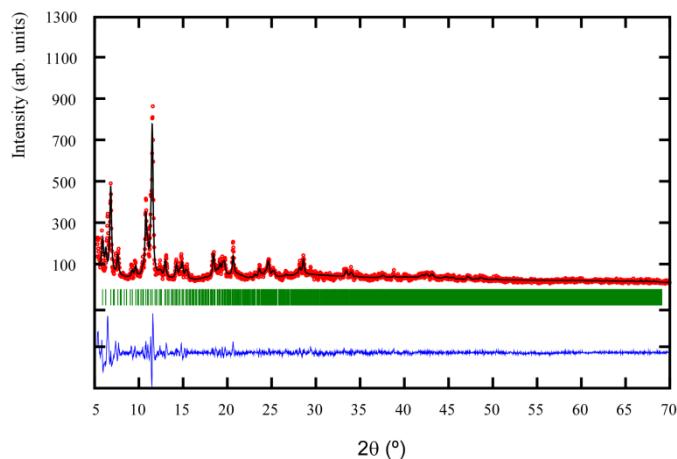

Pattern matching on MIL-C-OH2

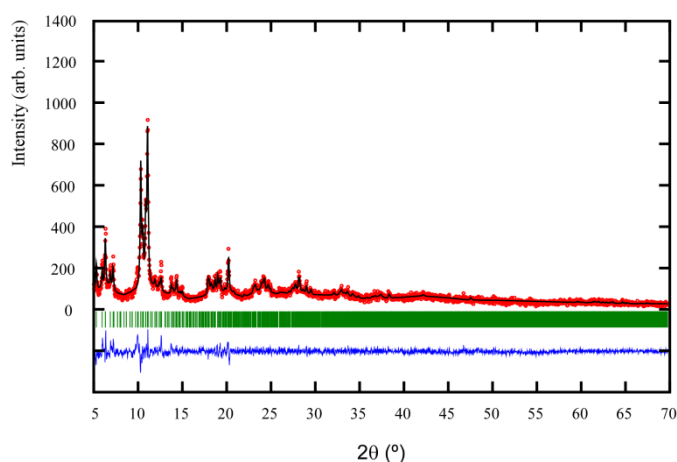

Pattern matching on MIL-N-OH2

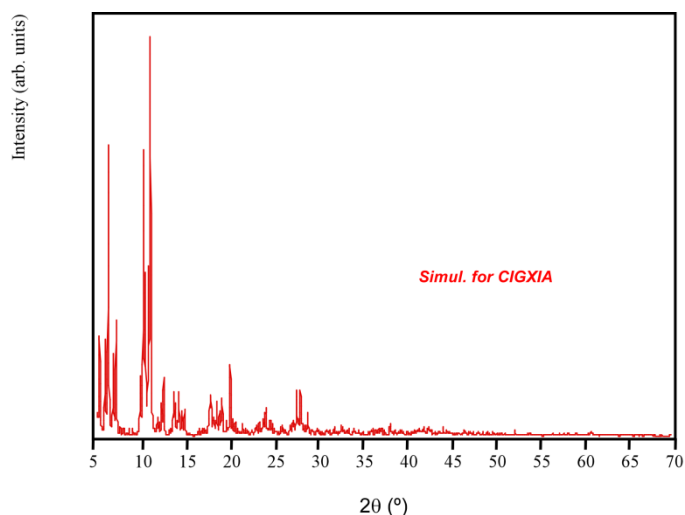

| CIGXIA                     |           |
|----------------------------|-----------|
| Crystal System             | Cubic     |
| Space group                | F d-3m    |
| a (Å)                      | 73.340(1) |
| b (Å)                      | 73.340(1) |
| c (Å)                      | 73.340(1) |
| α (°)                      | 90.00     |
| β (°)                      | 90.00     |
| γ (°)                      | 90.00     |
| Fitting data for MIL-C-OH2 |           |
| 2θ range                   | 5–70°     |
| Δ2θ                        | 0.026°    |
| Rf                         | 11.1      |
| Rb                         | 2.81      |
| Rp                         | 19.2      |
| Rwp                        | 26.5      |
| χ <sup>2</sup>             | 3.44      |
| Fitting data for MIL-N-OH2 |           |
| 2θ range                   | 5–70°     |
| Δ2θ                        | 0.026°    |
| Rf                         | 8.50      |
| Rb                         | 6.29      |
| Rp                         | 11.4      |
| Rwp                        | 15.8      |
| χ <sup>2</sup>             | 1.82      |

**Figure S3.3.** Left-up: pattern-matching refinement on MIL-C-OH2 and MIL-N-OH2 (green ticks: calculated reflections of CIGXIA phase). Left-down: simulated PXRD pattern of CIGXIA. Right: Crystal structure data and pattern-matching refinement data.

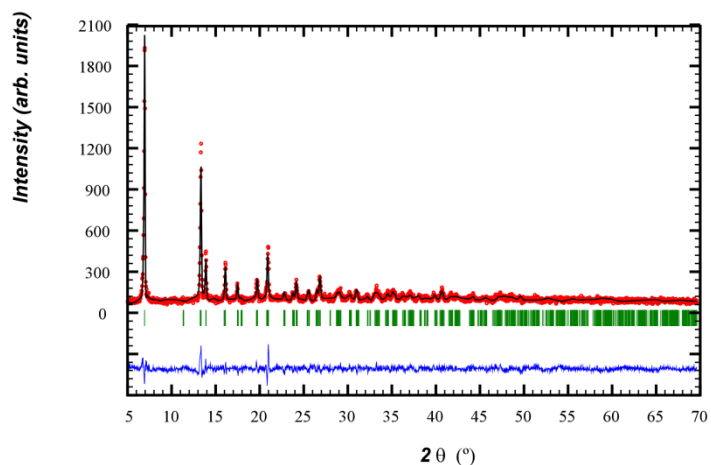

Pattern matching on MBioF-OH1

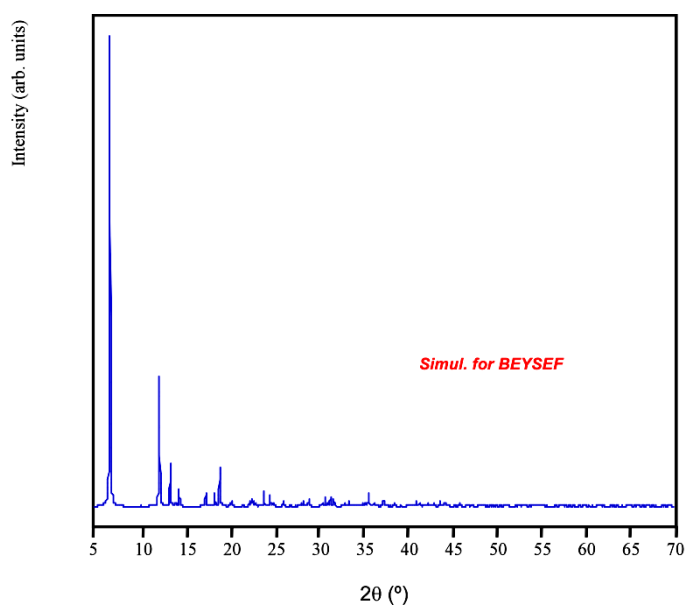

| BEYSEF         |                       |
|----------------|-----------------------|
| Crystal System | Tetragonal            |
| Space group    | I – 4 <sub>1</sub> /a |
| a (Å)          | 17.243(3)             |
| b (Å)          | 17.243(3)             |
| c (Å)          | 20.157(6)             |
| α (°)          | 90.00                 |
| β (°)          | 90.00                 |
| γ (°)          | 90.00                 |
| Fitting data   |                       |
| 2θ range       | 5–70°                 |
| Δ2θ            | 0.026°                |
| Rf             | 2.91                  |
| Rb             | 1.83                  |
| Rp             | 9.92                  |
| Rwp            | 12.7                  |
| χ <sup>2</sup> | 1.99                  |

**Figure S3.4.** *Left-up:* pattern-matching refinement on MBioF (green ticks: calculated reflections of BEYSEF phase). *Left-down:* simulated PXRD pattern of BEYSEF. *Right:* Crystal structure data and pattern-matching refinement data.

#### **S4. EFFECT OF THE HEATING RATES AND SOURCE ON SAMPLE CRYSTALLINITY**

In order to assess the effect of the solvent-free synthesis conditions on the materials properties, samples were prepared either varying the oven heating rates and microwave irradiation times. According to the PXRD patterns of Figures S4.1–S4.4 the lowering of the heating rate promotes a substantial increase in crystallinity of the samples. Regarding to the samples prepared by microwave heating, non meaningful differences are observed among the diffraction patterns of different irradiation times, but all them are less crystalline than those samples prepared under conventional heating. It deserves to note that in each compound all patterns are plotted at the same count scale. Figures S4.5-4.9 show a comparison of the SEM images for samples prepared under oven heating and microwave irradiation. The appearance of all samples is that of a polycrystalline one, with submicrometric crystallite sizes.

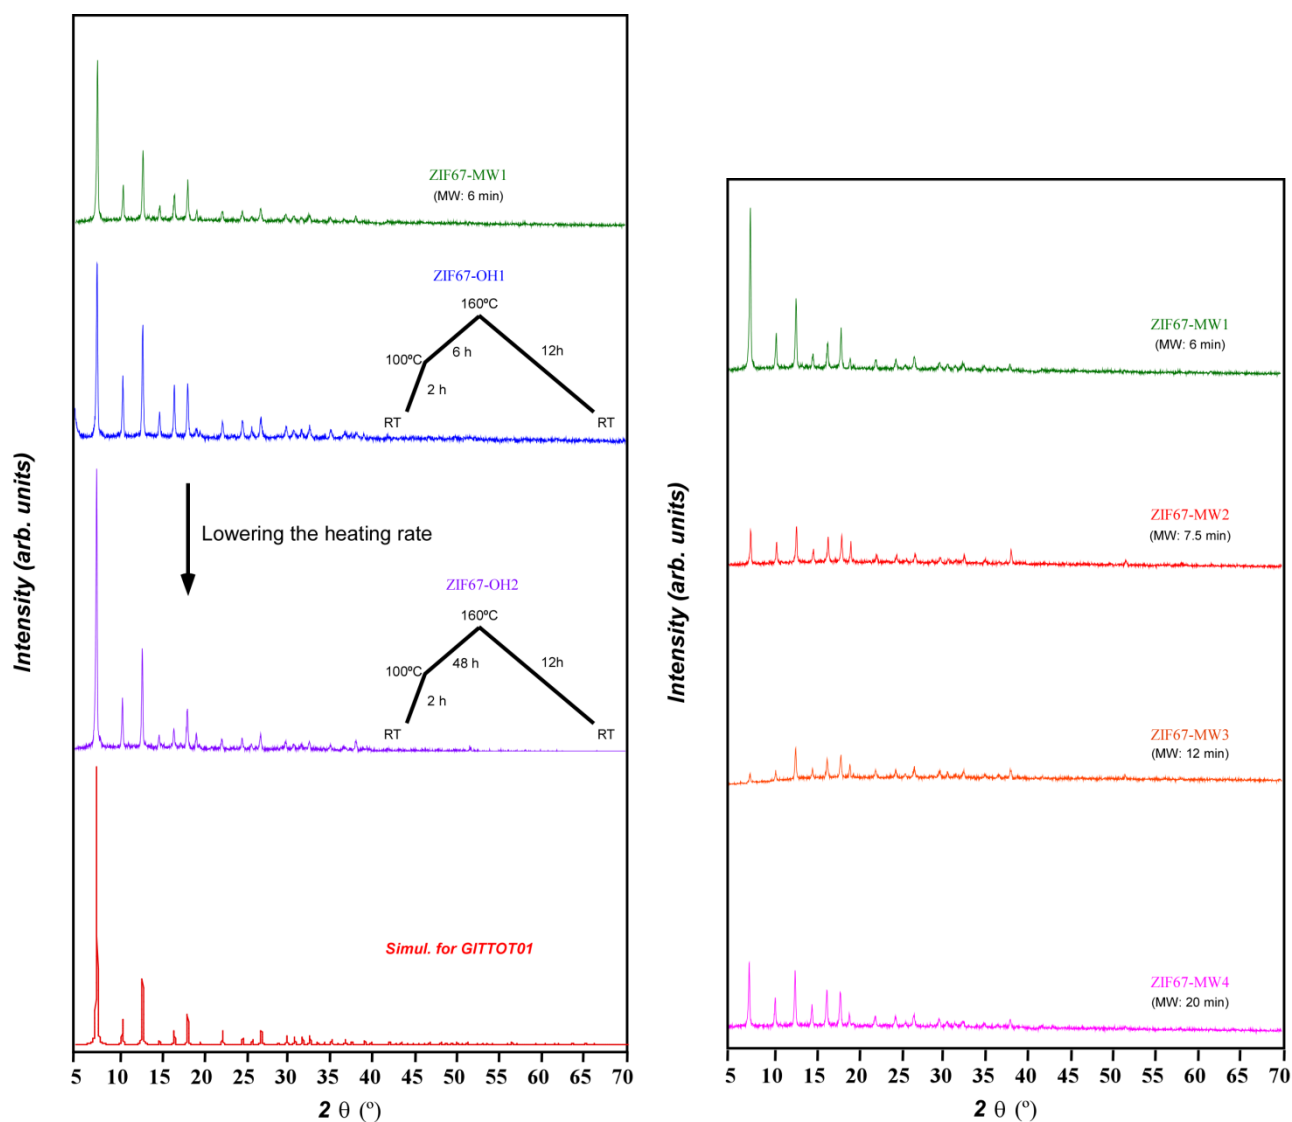

**Figure S4.1.** A comparison among the PXRD patterns of ZIF-67 samples prepared at different oven heating rates and microwave irradiation times.

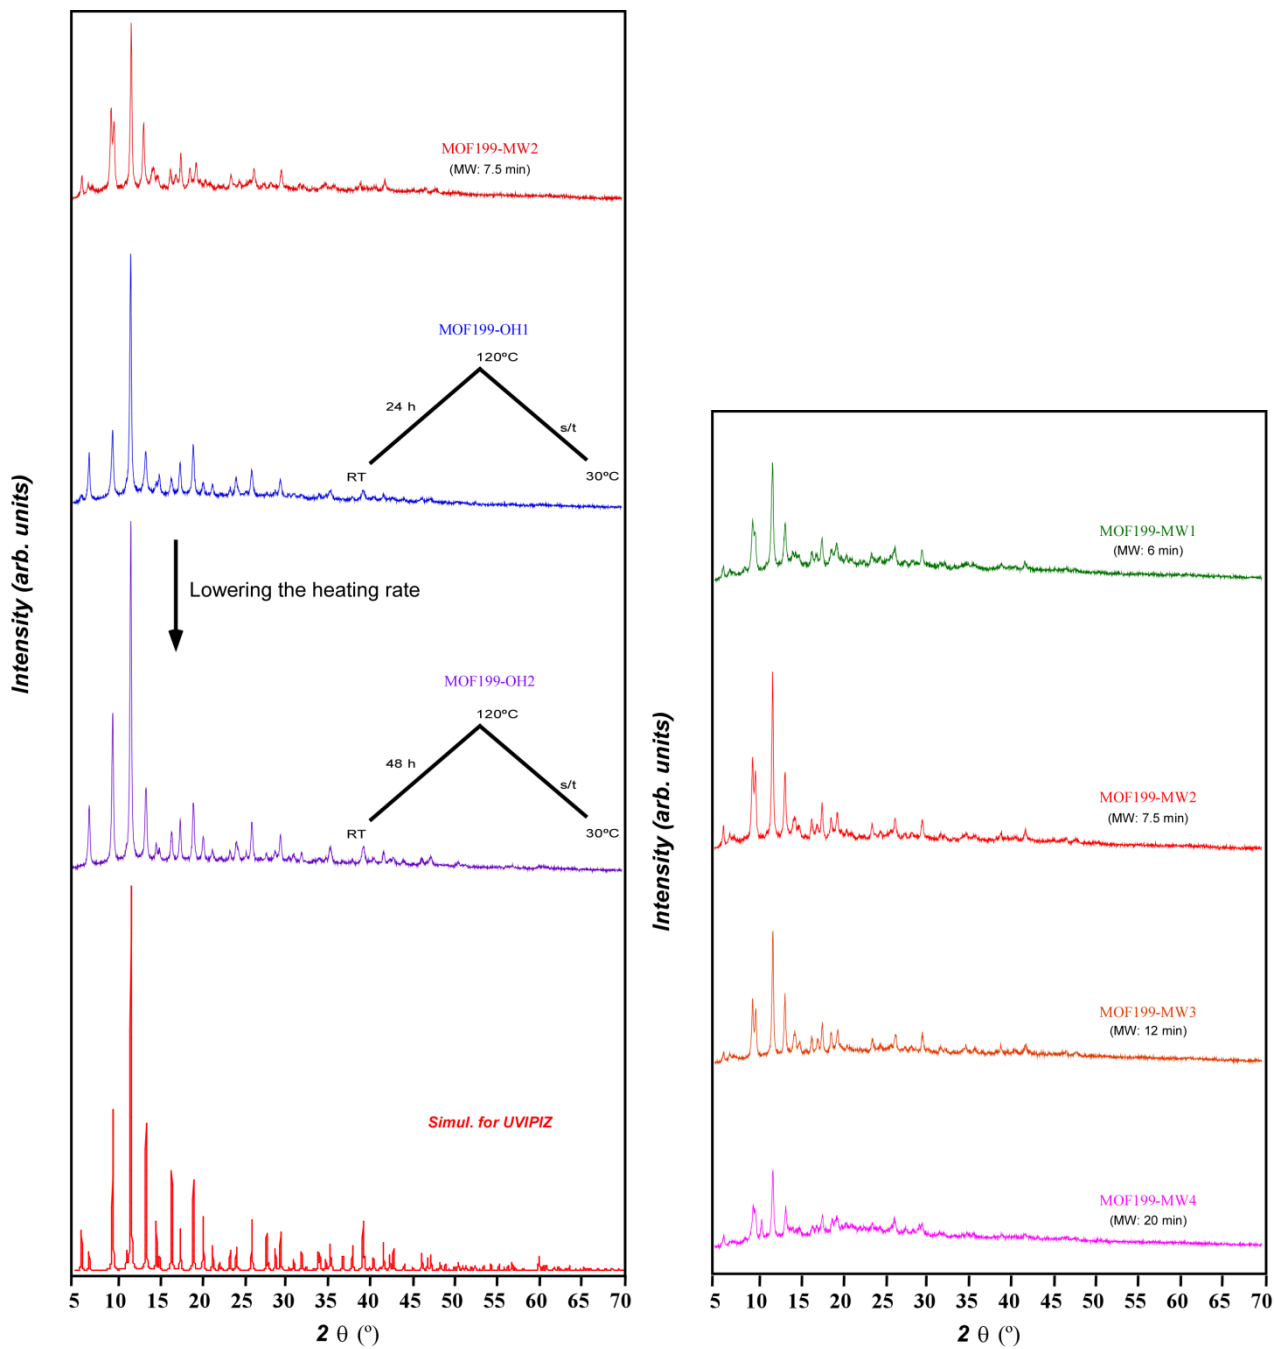

**Figure S4.2.** A comparison among the PXRD patterns of MOF-199 samples prepared at different oven heating rates and microwave irradiation times.

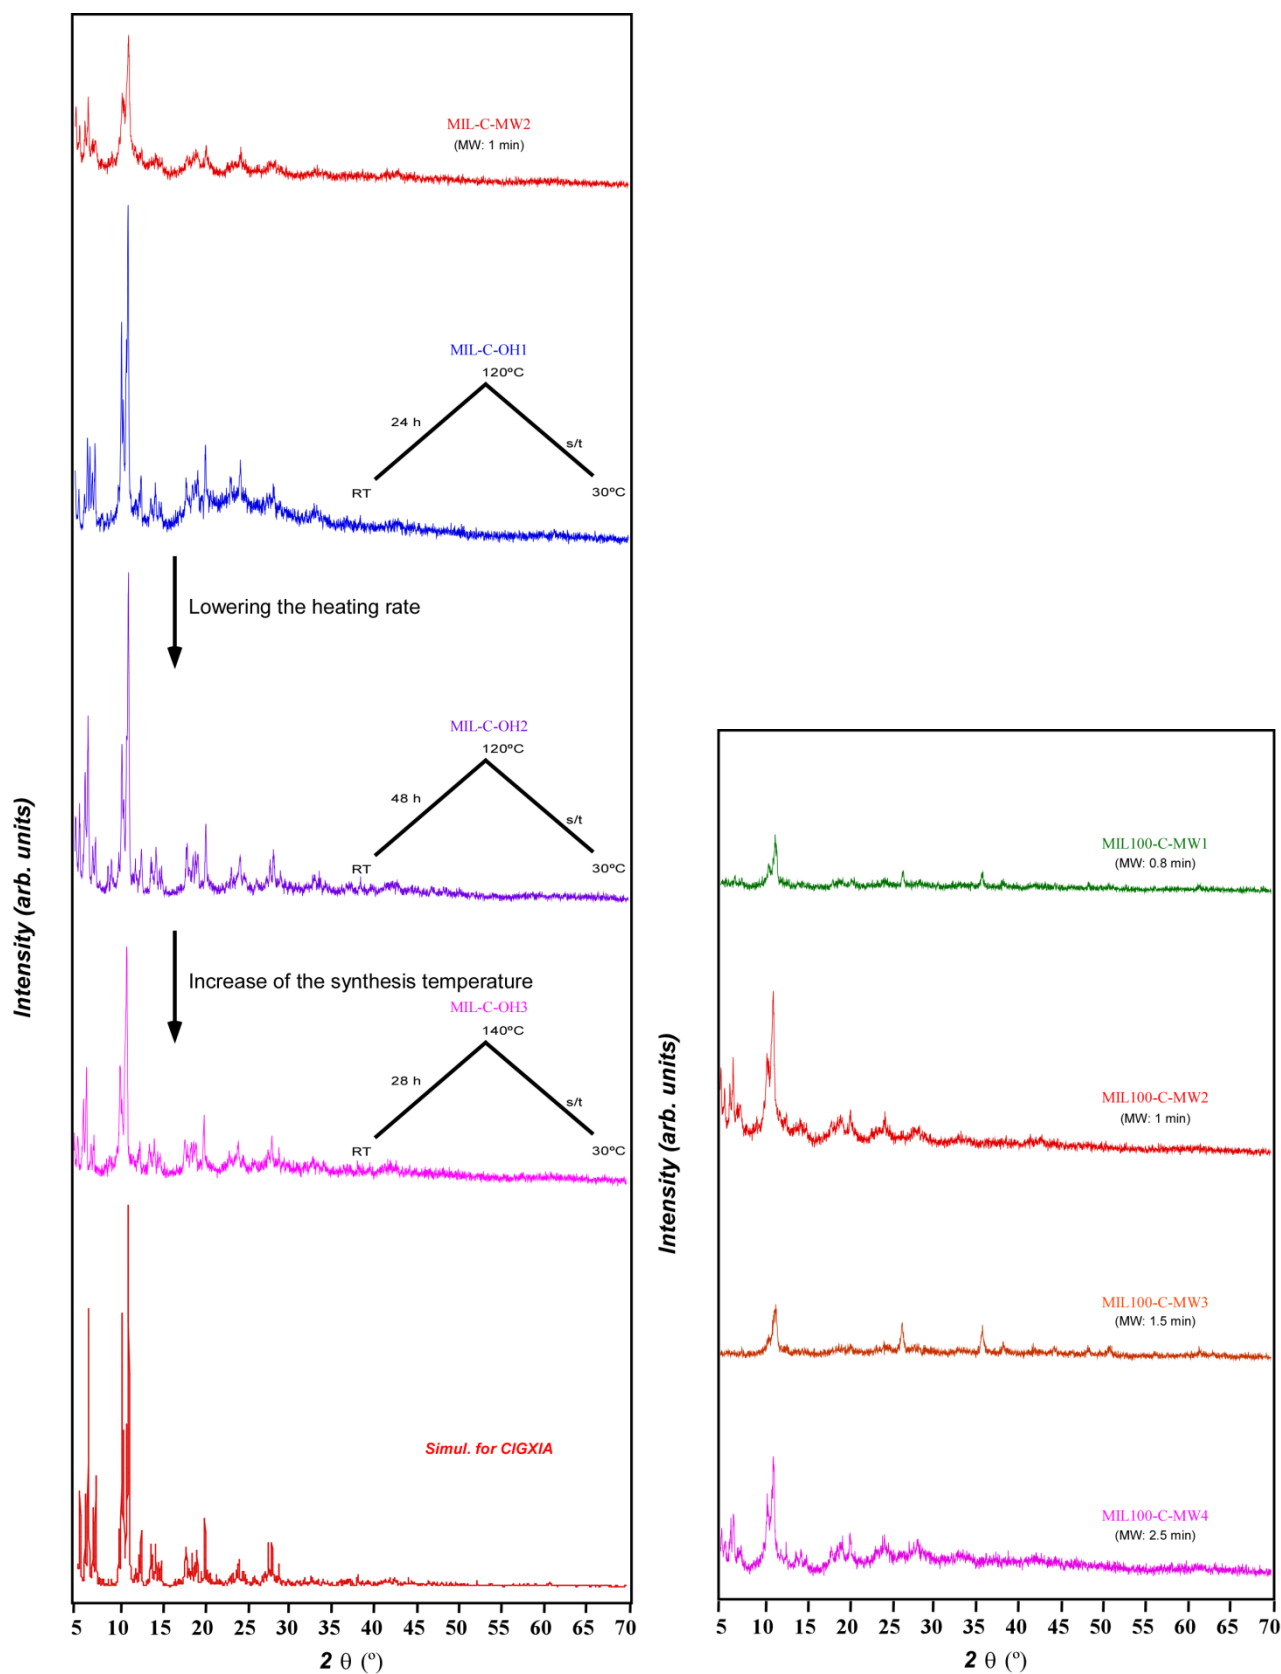

**Figure S4.3.** A comparison among the PXRD patterns of MIL-100(Fe/Cl) samples prepared at different oven heating rates and microwave irradiation times.



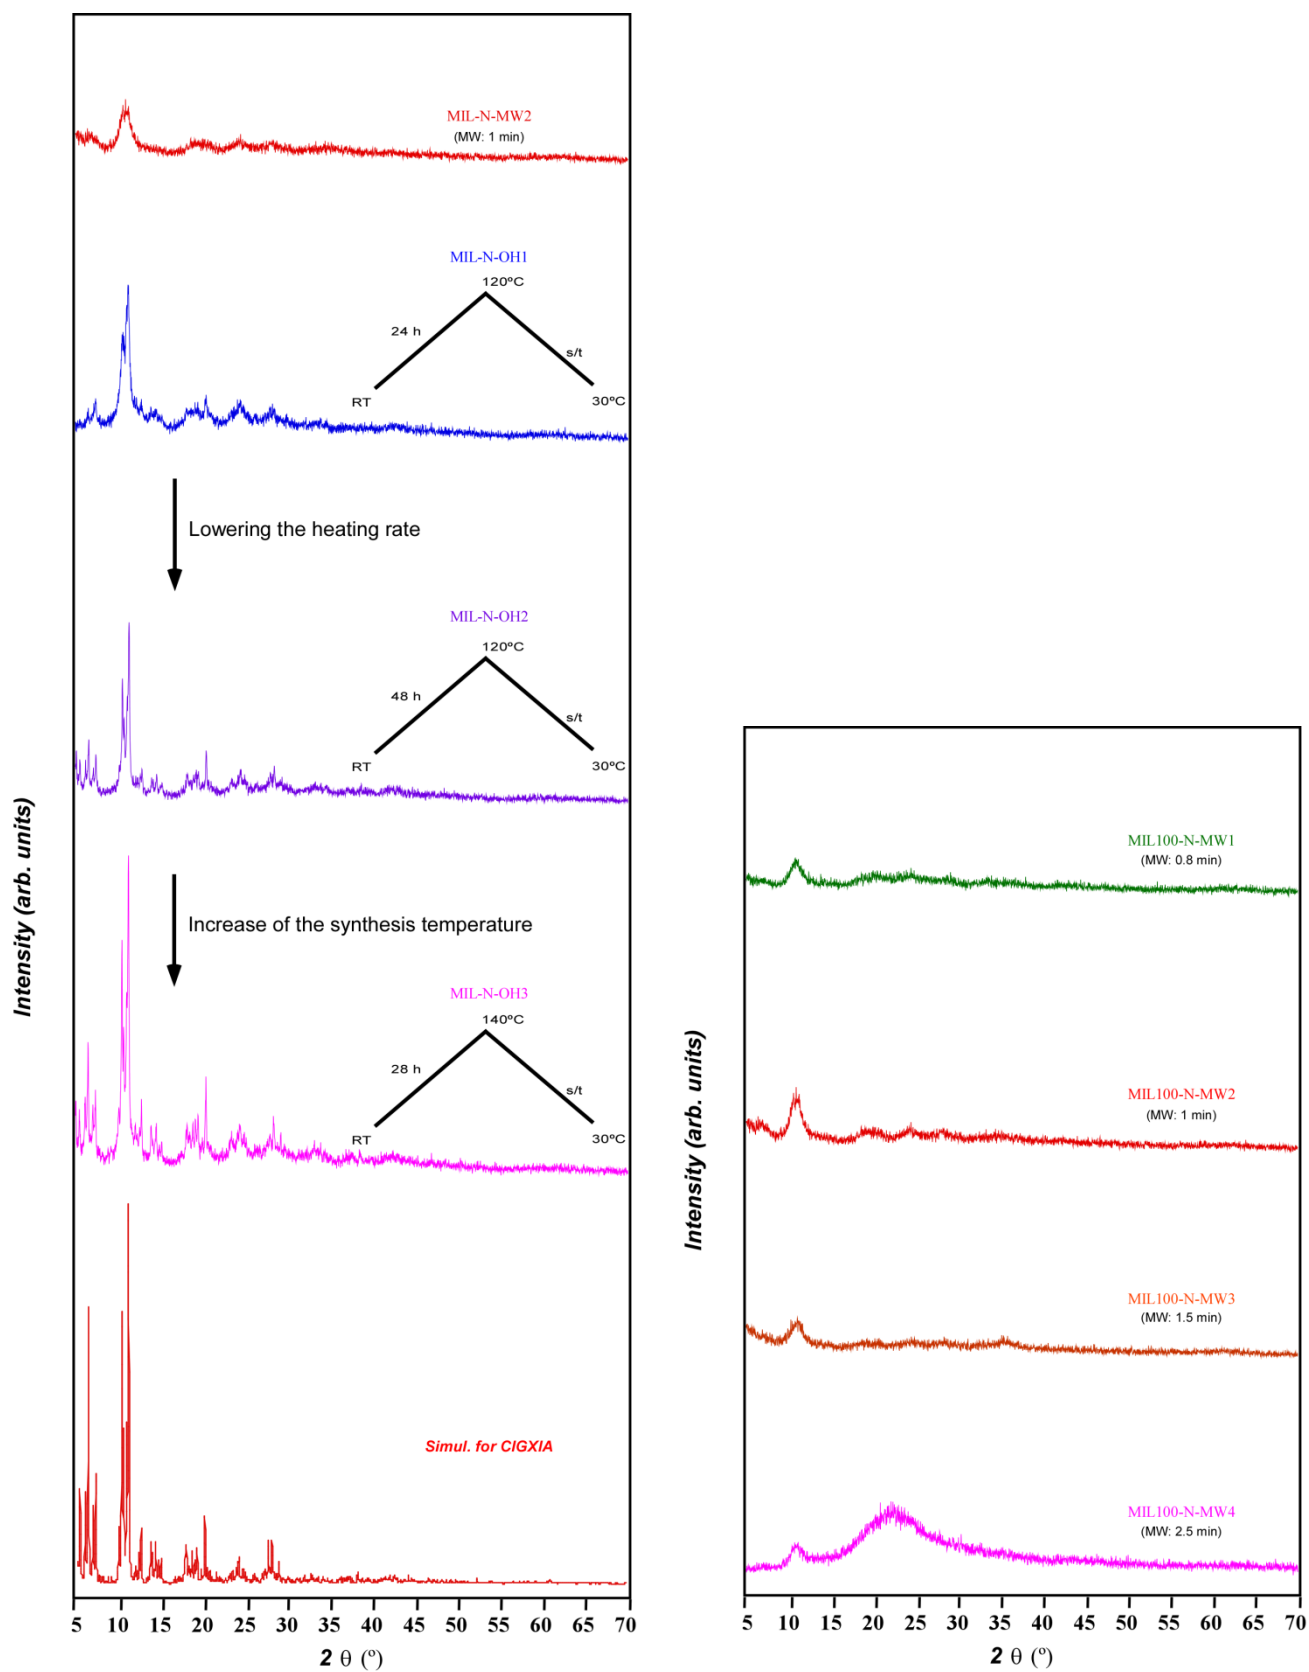

**Figure S4.4.** A comparison among the PXRD patterns of MIL-100(Fe/NO<sub>3</sub>) samples prepared at different oven heating rates and microwave irradiation times.

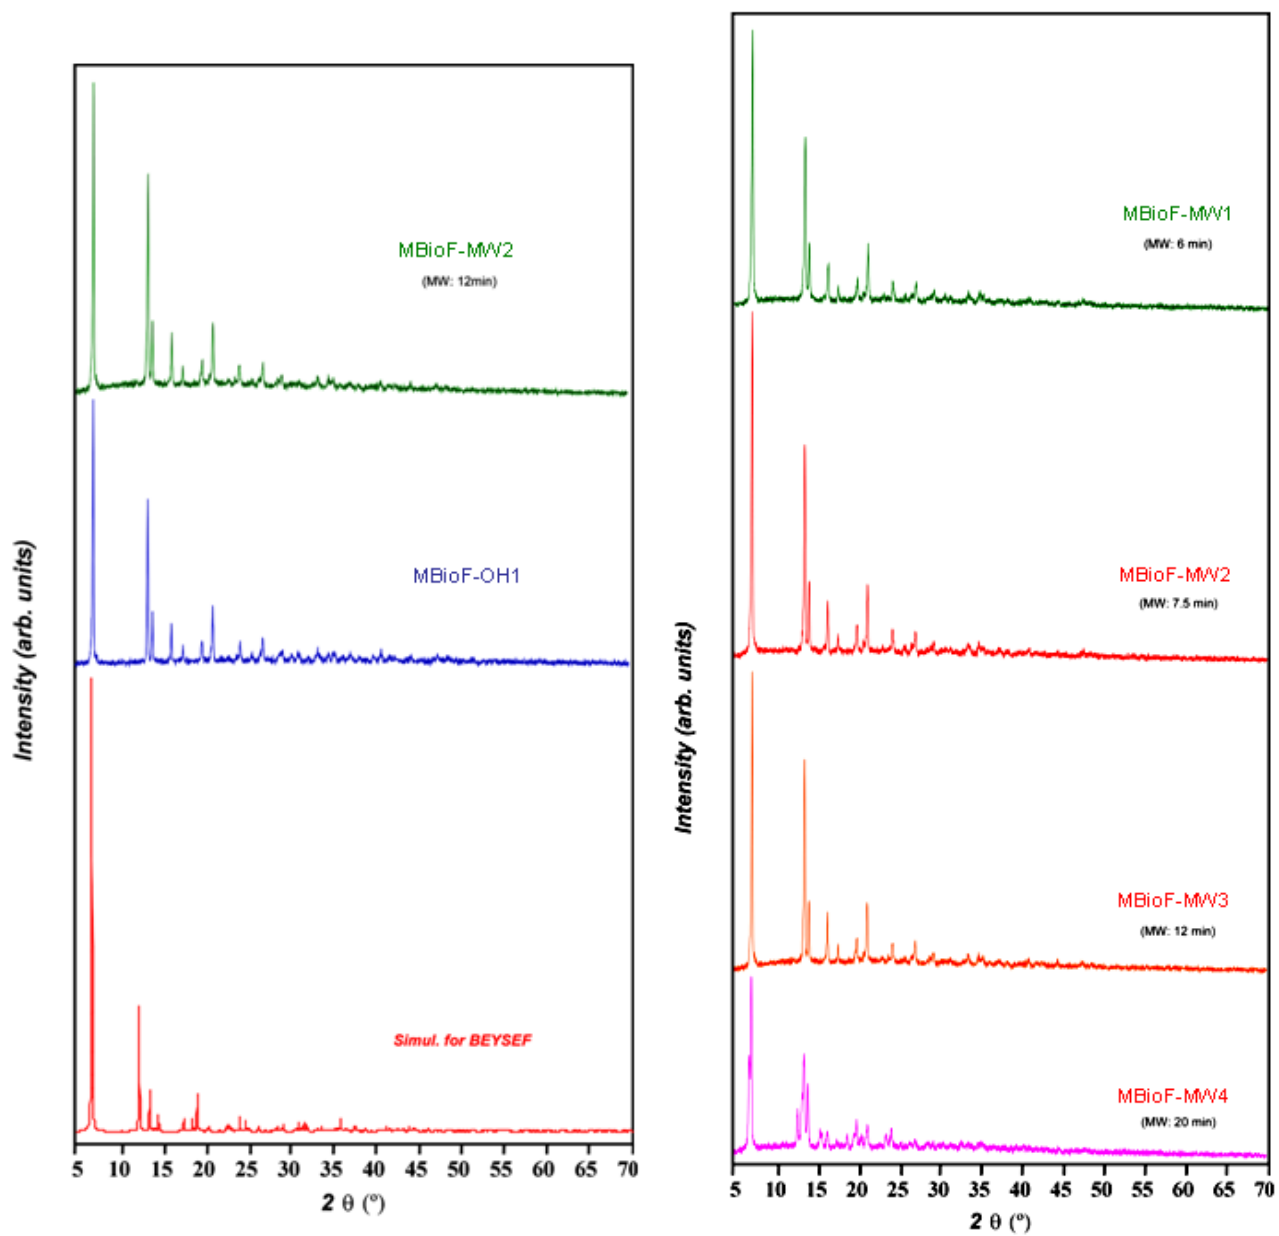

**Figure S4.5.** A comparison among the PXR patterns of MBioF samples prepared at different oven heating rates and microwave irradiation times.

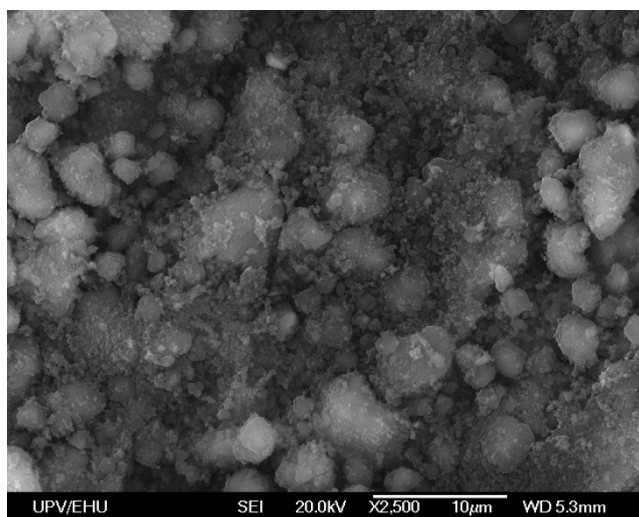

ZIF67-OH2

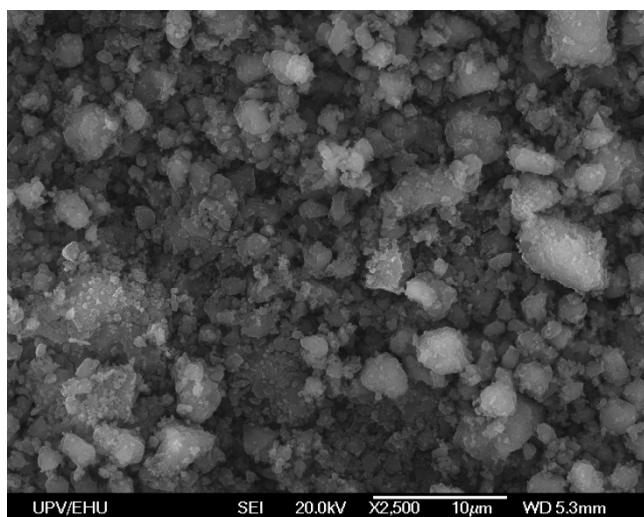

ZIF67-MW1

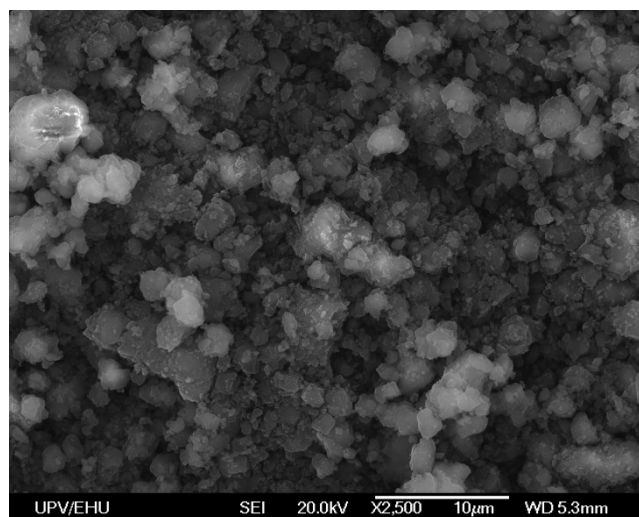

ZIF67-MW2

**Figure S4.5.** SEM images at 2.5 kX of ZIF-67 samples prepared by oven heating and microwave irradiation.

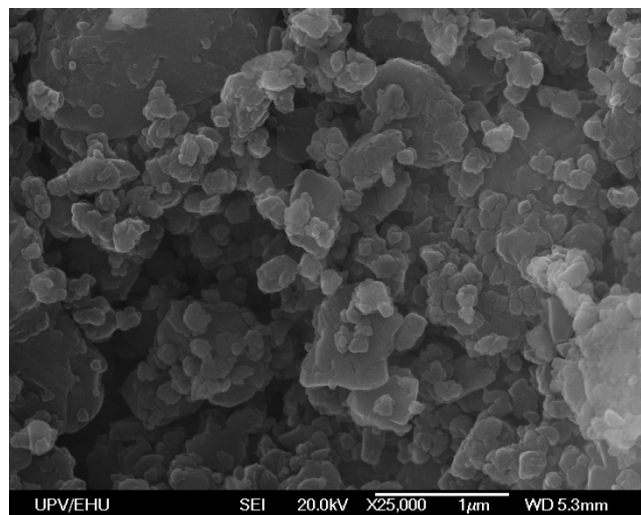

ZIF67-OH2

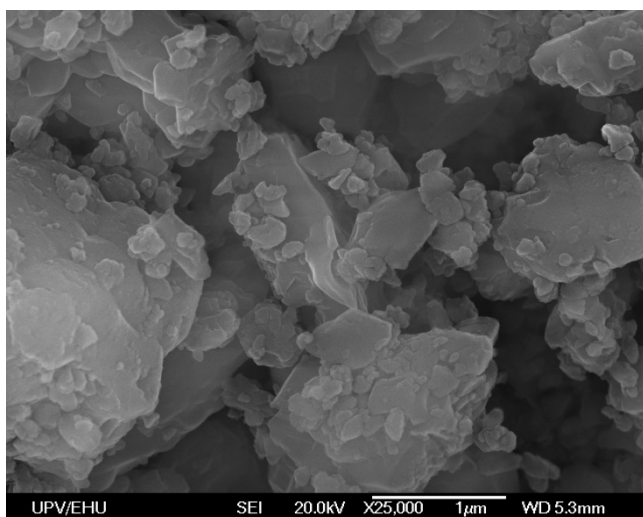

ZIF67-MW1

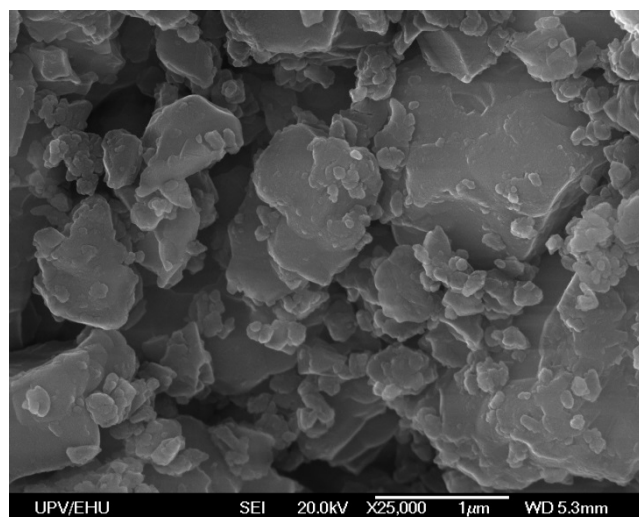

ZIF67-MW2

**Figure S4.6.** SEM images at 25 kX of ZIF-67 samples prepared by oven heating and microwave irradiation.

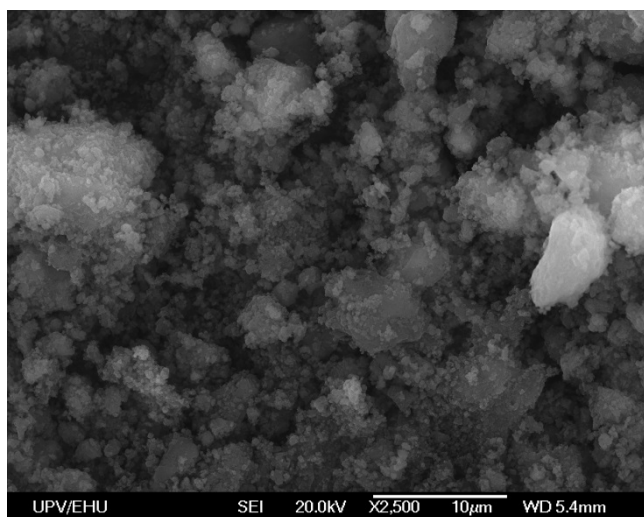

MOF199-OH1

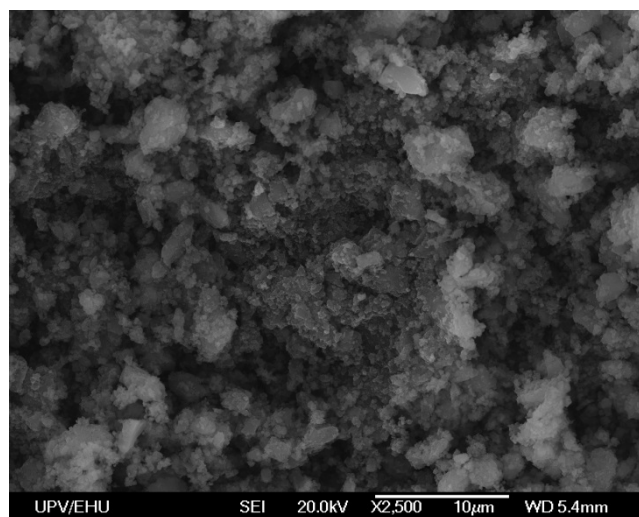

MOF199-OH2

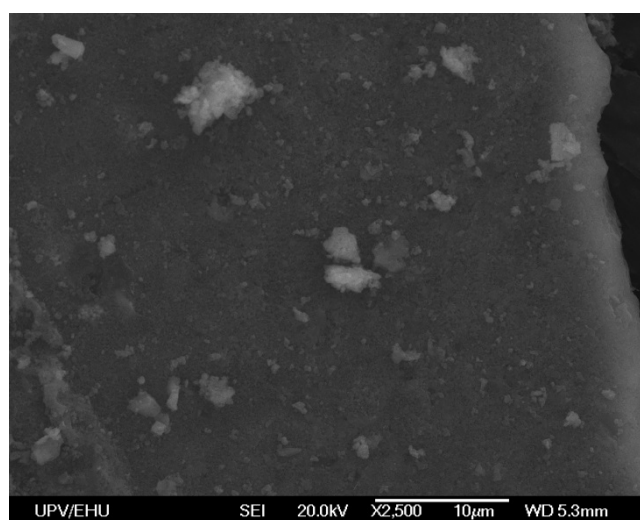

MOF199-MW2

**Figure S4.7.** SEM images at 2.5 kX of MOF-199 samples prepared by oven heating and microwave irradiation.

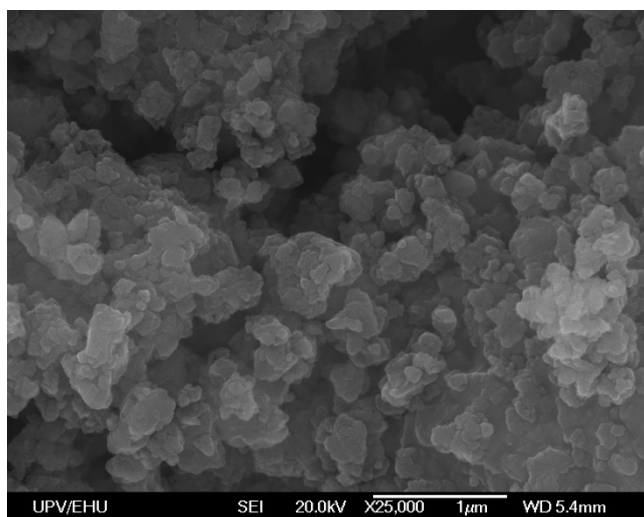

MOF199-OH1

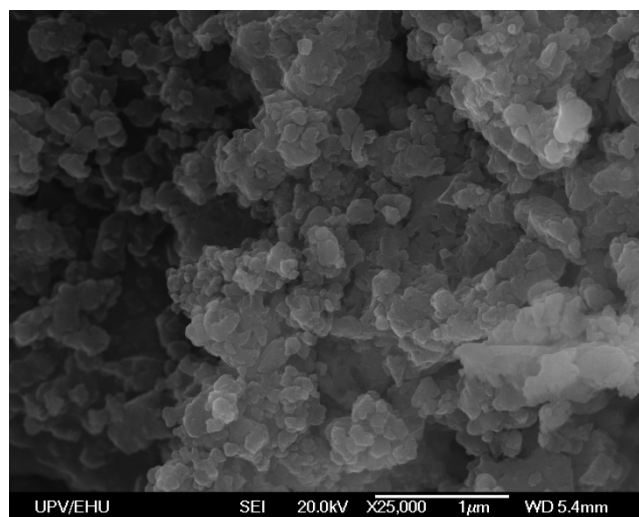

MOF199-OH2

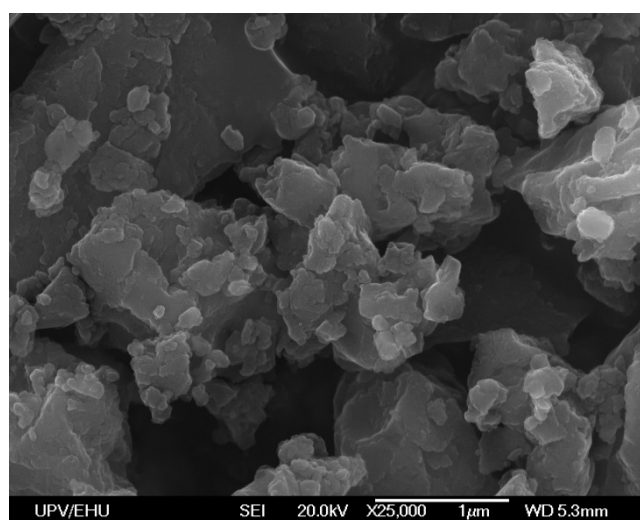

MOF199-MW2

**Figure S4.8.** SEM images at 25 kX of MOF-199 samples prepared by oven heating and microwave irradiation.

2.5 kX

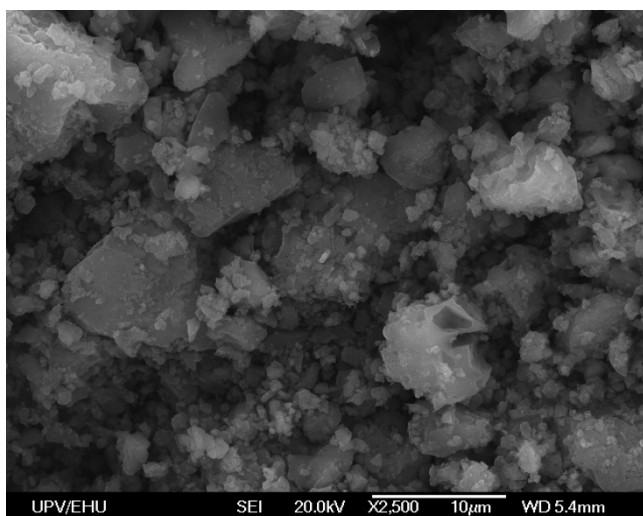

MIL-CI-OH2

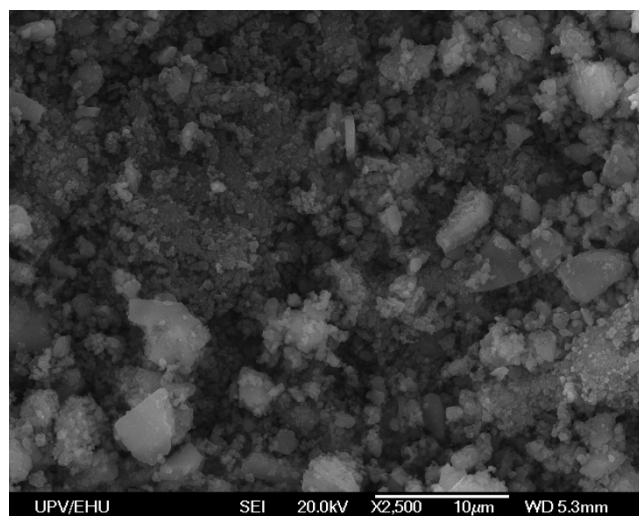

MIL-CI-MW2

25 kX

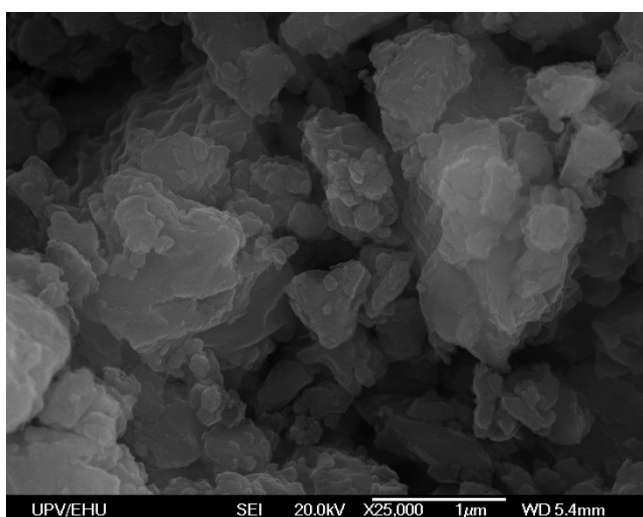

MIL-CI-OH2

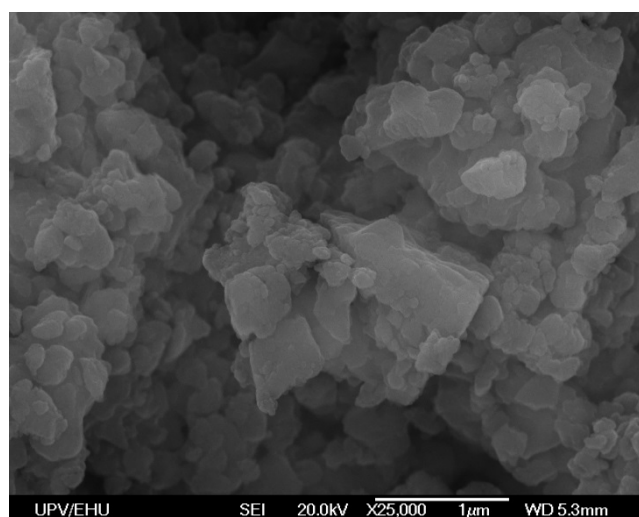

MIL-CI-MW2

**Figure S4.9.** SEM images at 2.5 and 25 kX of MIL-100(Fe/Cl) samples prepared by oven heating and microwave irradiation.

## **S5. N<sub>2</sub> ADSORPTION EXPERIMENTS**



The permanent porosity was studied by means of the measurements of N<sub>2</sub> adsorption isotherms at 77 K (Figure S5.1 and S5.2) using a *Micromeritics* ASAP 2010 analyser. All samples were dried under vacuum at 140°C during six hours to eliminate solvent guest molecules prior to measurements. It deserves to note that the crystallinity of the outgassed samples was retained as confirmed by XRPD measurements.

The surface area values were obtained by the fittings of the adsorption data to Braunauer-Emmett-Teller (BET) equation. In order to choose the pressure range appropriate and to avoid ambiguity when reporting the BET surface area of MOFs, we used the three consistency criteria proposed by Walton and Snurr:<sup>2</sup> (1) The pressure range selected should have values of V(P<sub>0</sub> - P) increasing with P/P<sub>0</sub>. (2) The points used to calculate the BET surface area must be linear with an upward slope. (3) The line they form must have a positive y-intercept. This procedure is commonly applied for determining the BET surface area values of high/ultrahigh MOFs.<sup>3</sup>

The V(P<sub>0</sub> - P) vs P/P<sub>0</sub> plots used to define the pressure range according to the first consistency criteria are showed in Figure S5.3 and S5.4. BET fitting data is gathered in Table 5.1.

---

<sup>2</sup> K. S. Walton, R. Q. Snurr, *J. Am. Chem. Soc.* **2007**, *127*, 8552.

<sup>3</sup> (a) O. K. Farha, A. O. Yazaydin, I. Eryazici, C. D. Malliakas, B. G. Hauser, M. G. Kanatzidis, S. T. Nguyen, R. Q. Snurr, J. T. Hupp, *Nat. Chem.* **2010**, *2*, 944. (b) H. Furukawa, N. Ko, Y. B. Go, N. Aratani, S. B. Choi, E. Choi, A. O. Yazaydin, R. Q. Snurr, M. O'Keeffe, J. Kim, O. M. Yaghi, *Science* **2010**, *329*, 424. (c) O. K. Farha, I. Eryazici, N. C. Jeong, B. G. Hauser, C. E. Wilmer, A. A. Sarjeant, R. Q. Snurr, S. T. Nguyen, A. O. Yazaydin and J. T. Hupp, *J. Am. Chem. Soc.* **2012**, *134*, 15016.

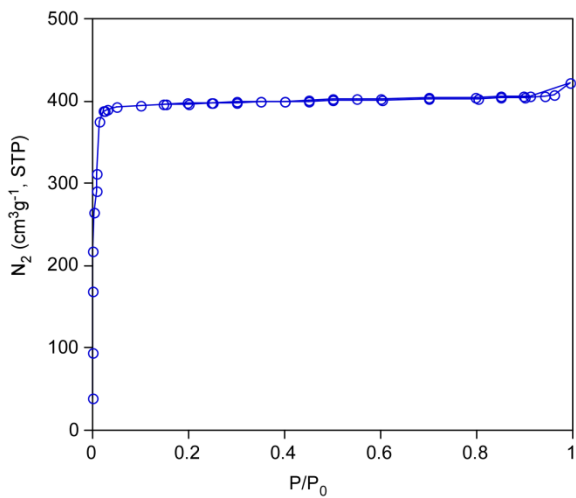

ZIF67-OH1

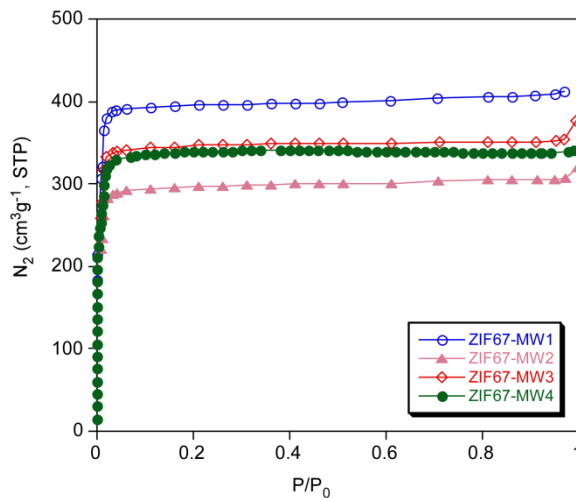

ZIF67-MW1 / ZIF67-MW2 / ZIF67-MW3 / ZIF67-MW4

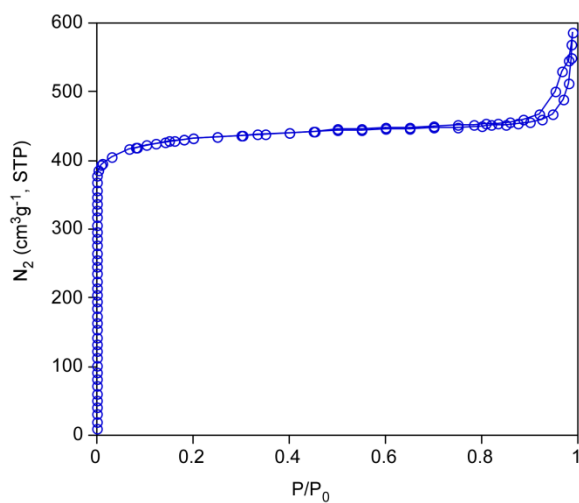

MOF199-OH2

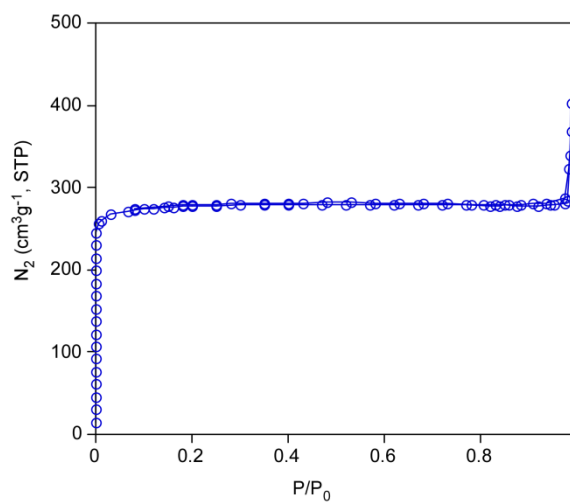

MOF199-MW2

**Figure S5.1.** Nitrogen adsorption isotherms at 77 K for ZIF-67 and MOF-199 compounds.

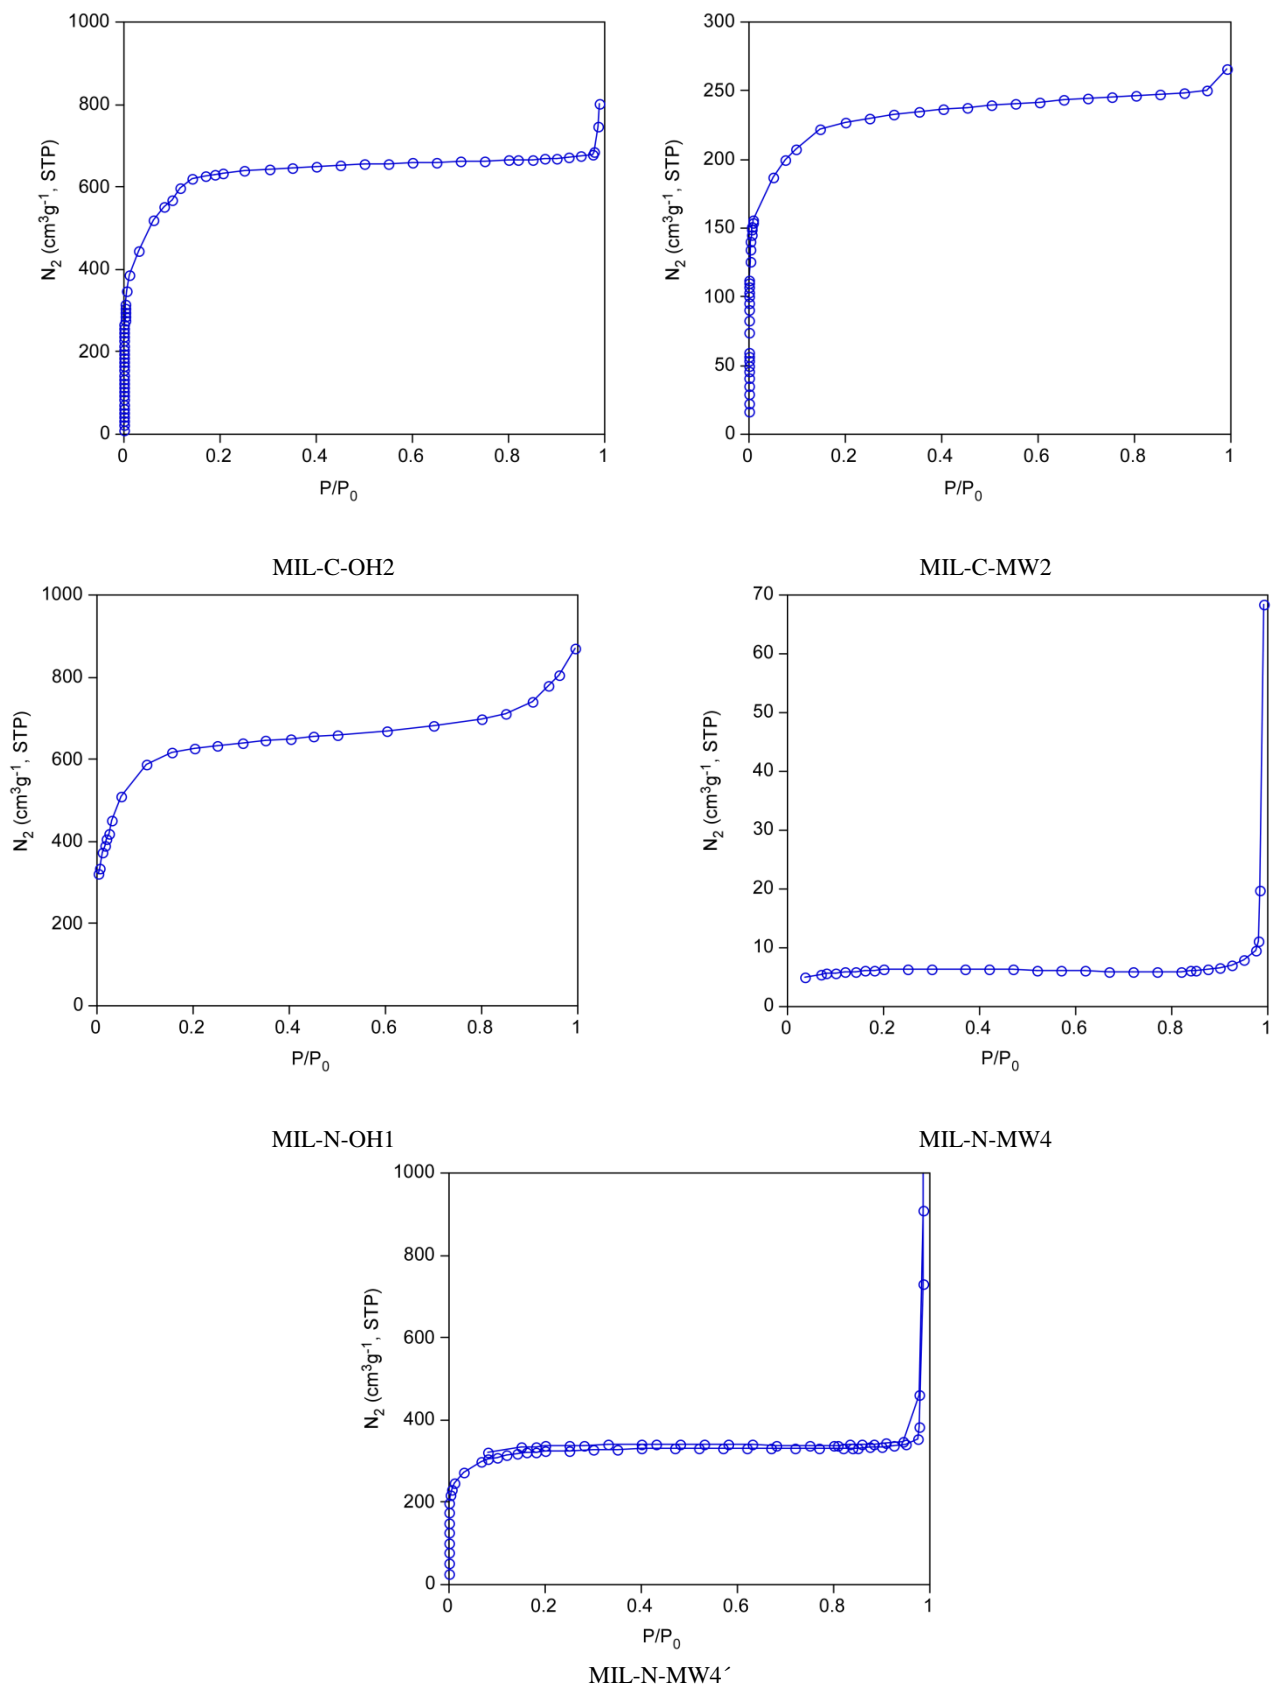

**Figure S5.2.** Nitrogen adsorption isotherms at 77 K for MIL-100(Fe/Cl) and MIL-100(Fe/NO<sub>3</sub>) compounds.

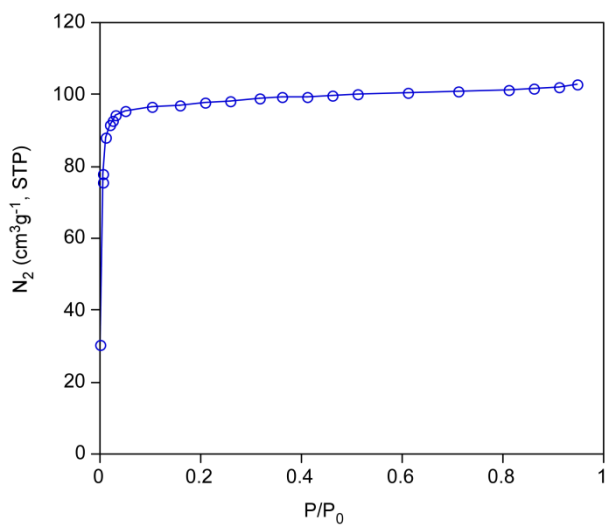

MBioF-OH1

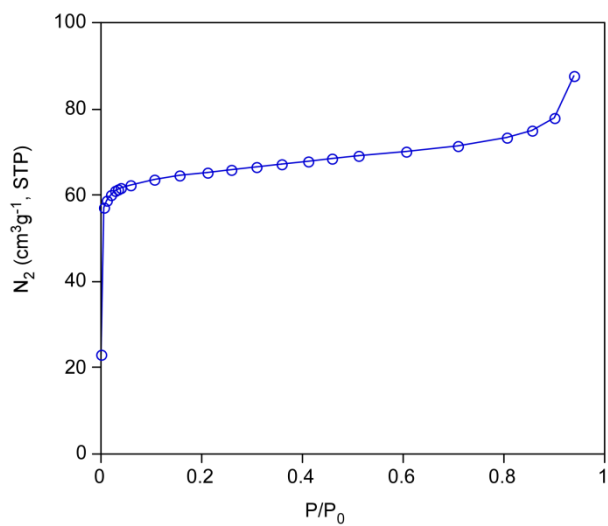

MBioF-MW2

**Figure S5.3.** Nitrogen adsorption isotherms at 77 K for MBioF-12 compounds.

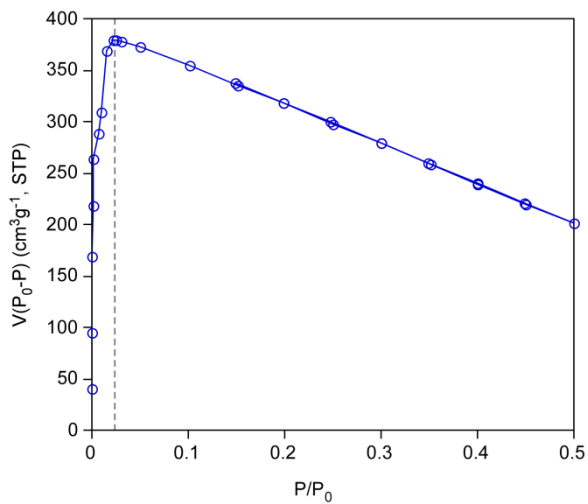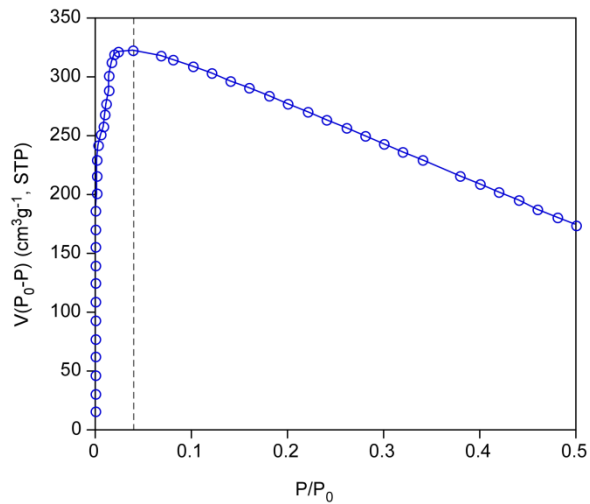

ZIF67-OH1

ZIF67-MW4

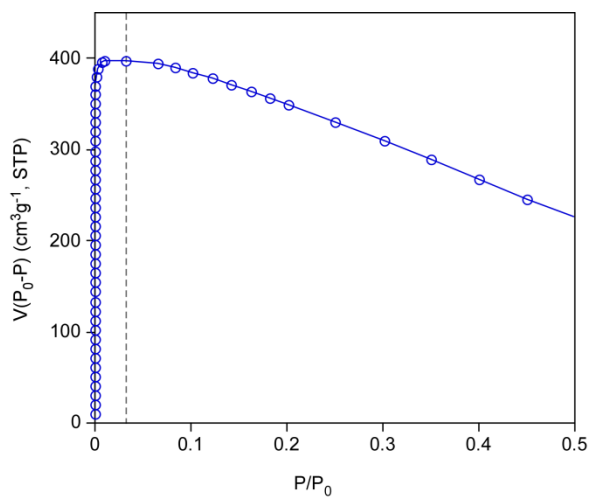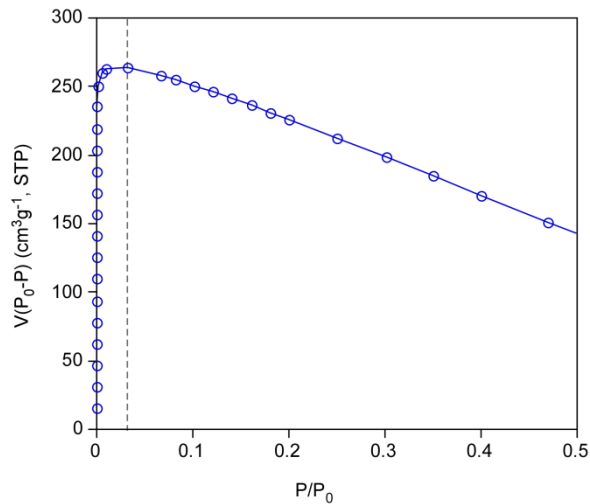

MOF199-OH2

MOF199-MW2

**Figure S5.4.** Consistency plot  $[V(P_0 - P)$  vs.  $P/P_0]$  for experimental  $N_2$  isotherms.

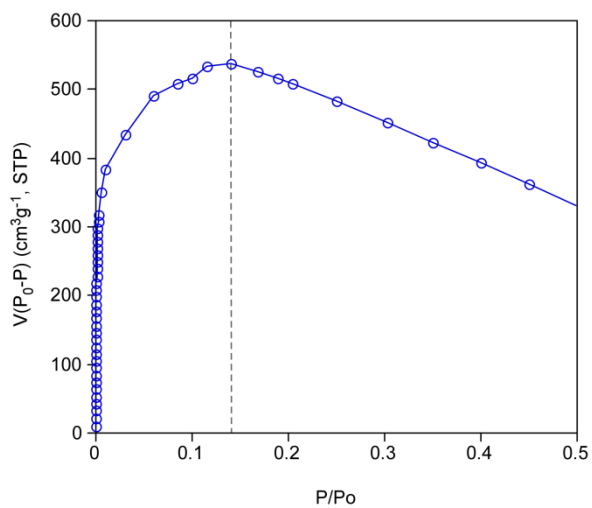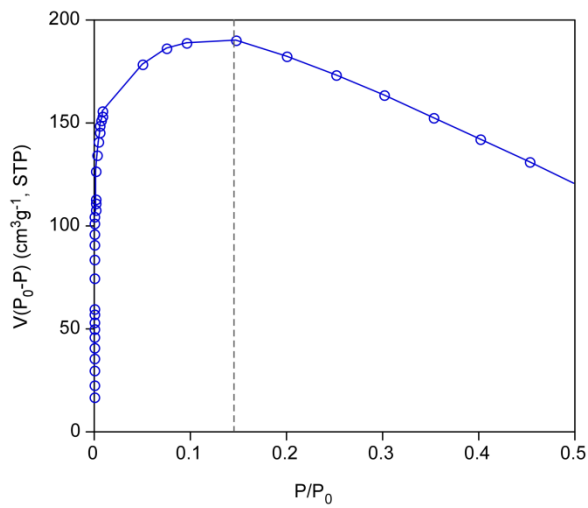

MIL-C-OH2

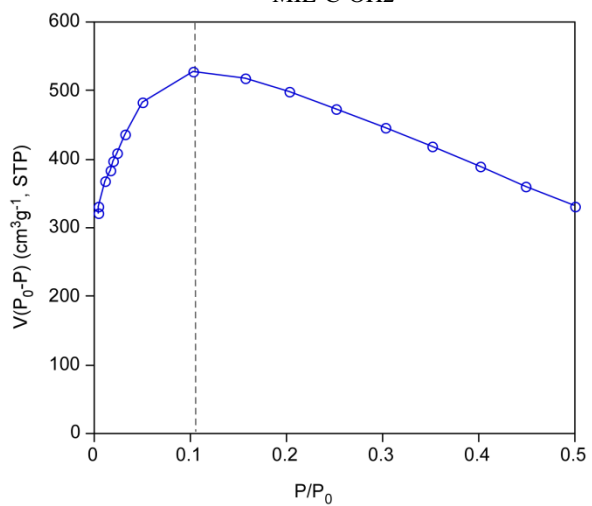

MIL-C-MW2

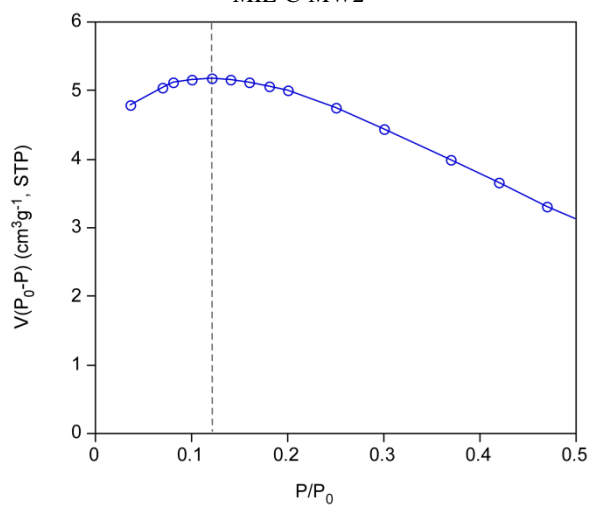

MIL-N-OH1

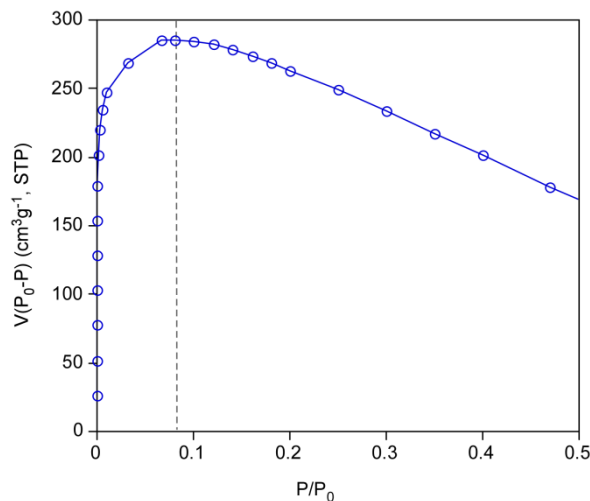

MIL-N-MW4

MIL-N-MW4'

**Figure S5.5.** Consistency plot [ $V(P_0 - P)$  vs.  $P/P_0$ ] for experimental  $N_2$  isotherms.

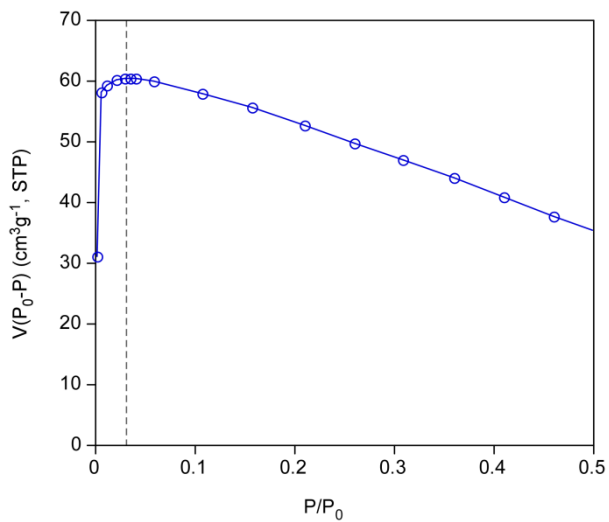

MBioF-OH1

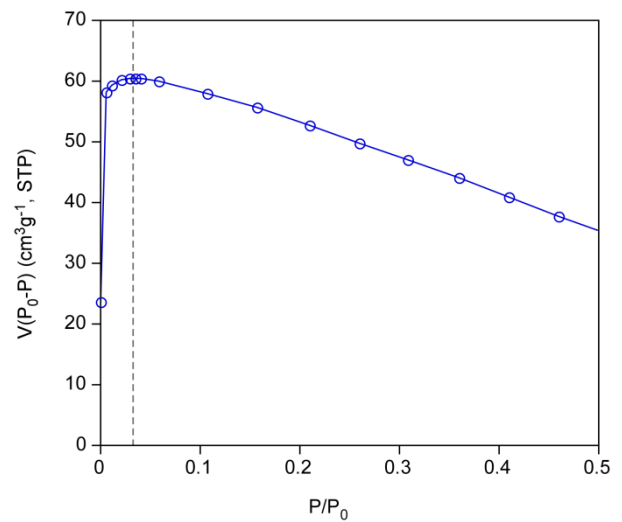

MBioF-MW2

**Figure S5.6.** Consistency plot [ $V(P_0 - P)$  vs.  $P/P_0$ ] for experimental  $N_2$  isotherms.

**Table 5.1.** BET fitting data.

| Sample     | Pressure range | Slope                | Intercept             | R <sup>2</sup> | <i>c</i>          | Area (m <sup>2</sup> /g) |
|------------|----------------|----------------------|-----------------------|----------------|-------------------|--------------------------|
| ZIF67-OH1  | 0.0150–0.0396  | $1.94 \cdot 10^{-3}$ | $4.263 \cdot 10^{-6}$ | 0.9980         | 361.0             | 1851                     |
| ZIF67-MW1  | 0.0097–0.0313  | $2.41 \cdot 10^{-3}$ | $6.70 \cdot 10^{-6}$  | 0.9963         | 361.0             | 1799                     |
| ZIF67-MW2  | 0.0090–0.0329  | $3.20 \cdot 10^{-3}$ | $1.12 \cdot 10^{-5}$  | 0.9970         | 311.2             | 1355                     |
| ZIF67-MW3  | 0.0087–0.0340  | $2.79 \cdot 10^{-3}$ | $7.06 \cdot 10^{-6}$  | 0.9950         | 368.6             | 1555                     |
| ZIF67-MW4  | 0.0082–0.0140  | $2.87 \cdot 10^{-3}$ | $9.919 \cdot 10^{-6}$ | 0.9996         | 313.5             | 1512                     |
| MOF199-OH2 | 0.0008–0.0319  | $2.54 \cdot 10^{-3}$ | $1.02 \cdot 10^{-7}$  | 0.9999         | $24.8 \cdot 10^3$ | 1713                     |
| MOF199-MW2 | 0.0002–0.0316  | $3.85 \cdot 10^{-3}$ | $2.21 \cdot 10^{-7}$  | 0.9999         | $17.4 \cdot 10^3$ | 1130                     |
| MIL-C-OH2  | 0.0604–0.1409  | $1.73 \cdot 10^{-3}$ | $2.05 \cdot 10^{-5}$  | 0.9992         | 85.1              | 2492                     |
| MIL-C-MW2  | 0.0497–0.1478  | $5.11 \cdot 10^{-3}$ | $2.32 \cdot 10^{-5}$  | 0.9999         | 221.7             | 849                      |
| MIL-N-OH1  | 0.0198–0.1029  | $1.74 \cdot 10^{-3}$ | $1.66 \cdot 10^{-5}$  | 0.9998         | 105.6             | 2486                     |
| MIL-N-MW4  | 0.0689–0.1203  | $1.86 \cdot 10^{-1}$ | $7.30 \cdot 10^{-4}$  | 0.9999         | 256.1             | 23                       |
| MIL-N-MW4' | 0.0052–0.0802  | $3.49 \cdot 10^{-3}$ | $6.37 \cdot 10^{-6}$  | 0.9997         | 549.5             | 1245                     |
| MBioF-OH1  | 0.0062–0.0252  | $1.05 \cdot 10^{-2}$ | $1.34 \cdot 10^{-5}$  | 0.9996         | 784.1             | 415                      |
| MBioF-MW2  | 0.0118–0.0402  | $1.68 \cdot 10^{-2}$ | $4.23 \cdot 10^{-6}$  | 0.9999         | 3962.8            | 260                      |



## **S6. COMPARATIVE BETWEEN SYNTHESIS ROUTE AND SURFACE AREA**

**Table 6.1.** A comparative between the synthesis route and achieved BET surface area value.

| Synthesis Type                                                                      | Solvent       | Reagents                                                     | Areas (m <sup>2</sup> /g) | Reference        |
|-------------------------------------------------------------------------------------|---------------|--------------------------------------------------------------|---------------------------|------------------|
| <b>ZIF-67</b>                                                                       |               |                                                              |                           |                  |
| Solvent-free                                                                        | --            | Co(OH) <sub>2</sub>                                          | 1851                      | <i>This work</i> |
| MW-solvent-free                                                                     | --            | Co(OH) <sub>2</sub>                                          | 1799                      | <i>This work</i> |
| Steam assisted                                                                      | water         | Co(OAc) <sub>2</sub> , HmIm                                  | 1319                      | <sup>4</sup>     |
| Stirring                                                                            | water         | Cu(NO <sub>3</sub> ) <sub>2</sub> , HmIm, TEA                | 868                       | <sup>5</sup>     |
| Stirring                                                                            | water         | Cu(NO <sub>3</sub> ) <sub>2</sub> , HmIm                     | 316                       | <sup>6</sup>     |
| <b>MOF-199</b>                                                                      |               |                                                              |                           |                  |
| MW-Solvothermal                                                                     | DMF           | Cu(NO <sub>3</sub> ) <sub>2</sub> , H <sub>3</sub> BTC       | 1944                      | <sup>7</sup>     |
| Solvent-free                                                                        | --            | Cu(OAc) <sub>2</sub> , H <sub>3</sub> BTC                    | 1713                      | <i>This work</i> |
| Solvothermal                                                                        | DMF           | Cu(OAc) <sub>2</sub> , H <sub>3</sub> BTC                    | 1507                      | <sup>8</sup>     |
| MW-solvent-free                                                                     | --            | Cu(OAc) <sub>2</sub> , H <sub>3</sub> BTC                    | 1130                      | <i>This work</i> |
| Sonochemical                                                                        | DMF           | Cu(NO <sub>3</sub> ) <sub>2</sub> , H <sub>3</sub> BTC       | 1100                      | <sup>9</sup>     |
| Solvothermal                                                                        | water/ethanol | Cu(NO <sub>3</sub> ) <sub>2</sub> , H <sub>3</sub> BTC       | 692                       | <sup>10</sup>    |
| Solvothermal                                                                        | ethanol       | Cu(NO <sub>3</sub> ) <sub>2</sub> , H <sub>3</sub> BTC       | 1656                      | <sup>11</sup>    |
| Electrochemical                                                                     | methanol      | Cu <sup>0</sup> , H <sub>3</sub> BTC                         | 1820                      | <sup>12</sup>    |
| <b>MIL100-(Fe/X); X: F<sup>-</sup>, Cl<sup>-</sup>, NO<sub>3</sub><sup>-</sup>.</b> |               |                                                              |                           |                  |
| Solvent-free                                                                        | --            | FeX <sub>3</sub> , H <sub>3</sub> BTC                        | 2492                      | <i>This work</i> |
| Solvothermal                                                                        | water         | Fe <sup>0</sup> , H <sub>3</sub> BTC, HF, HNO <sub>3</sub>   | 2320                      | <sup>13</sup>    |
| MW-solvent-free                                                                     | --            | FeCl <sub>3</sub> , H <sub>3</sub> BTC                       | 849                       | <i>This work</i> |
| MW-Solvothermal                                                                     | water         | FeCl <sub>3</sub> , H <sub>3</sub> BTC, HF, HNO <sub>3</sub> | 1474                      | <sup>14</sup>    |
| Spray drying                                                                        | water         | FeCl <sub>3</sub> , H <sub>3</sub> BTC                       | 1000                      | <sup>15</sup>    |
| Solvothermal                                                                        | water/ethanol | FeCl <sub>3</sub> , H <sub>3</sub> BTC                       | 860-1350                  | <sup>16</sup>    |
| <i>Solvothermal</i>                                                                 | <i>water</i>  | <i>FeCl<sub>3</sub>, H<sub>3</sub>BTC</i>                    | <i>1136</i>               | <sup>17</sup>    |

<sup>4</sup> Q. Shi, Z. Chen, Z. Song, J. Li, J. Dong, *Angew. Chem. Int. Edit.*, **2011**, 50, 672.

<sup>5</sup> A. F. Gross, E. Sherman, J. J. Vajo, *Dalton Trans.*, **2012**, 41, 5458

<sup>6</sup> N. Mntungwa, V. S. R. R. Pullabhotla, N. Revaprasadu, *Mater. Lett.*, **2012**, 82, 220.

<sup>7</sup> A. G. Wong-Foy, A. J. Matzger, O. M. Yaghi, *J. Am. Chem. Soc.*, **2006**, 128, 3494.

<sup>8</sup> J. L. C. Rowsell, O. M. Yaghi, *J. Am. Chem. Soc.*, **2006**, 128, 1304.

<sup>9</sup> Z.-Q. Li, L.-G. Qiu, T. Xu, Y. Wu, W. Wang, Z.-Y. Wu, X. Jiang., *Mater. Lett.*, **2009**, 63, 78.

<sup>10</sup> S. S.-Y. Chui, S. M.-F. Lo, J. P. H. Charmant, A. G. Orpen, I. D. Williams, *Science*, **1999**, 283, 1148.

<sup>11</sup> N. A. Khan, S. H. Jung, *Micropor. Mesopor. Mater.*, **2009**, 119, 331.

<sup>12</sup> U. Mueller, M. Schubert, F. Teich, H. Puetter, K. Schierle-Arndt, J. Pastré, *J. Mater. Chem.*, **2006**, 16, 626.

<sup>13</sup> J. W. Yoon, Y.-K. Seo, Y. K. Hwang, J.-S. Chang, H. Leclerc, S. Wuttke, P. Bazin, A. Vimont, M. Daturi, E. Bloch, P. L. Llewellyn, C. Serre, P. Horcajada, J.-M. Grenche, A. E. Rodrigues, G. Férey. *Angew. Chem. Int. Edit.*, **2010**, 49, 5949.

<sup>14</sup> J.-D. Xiao, L.-G. Qiu, X. Jiang, Y.-J. Zhu, S. Ye, X. Jiang, *Carbon*, **2013**, 59, 372.

<sup>15</sup> A. Garcia Marquez, P. Horcajada, D. Grosso, G. Férey, C. Serre, C. Sanchez, C. Boissiere, *Chem. Commun*, **2013**, 49, 3848.

<sup>16</sup> A. García Márquez, A. Demessence, A. E. Platero-Prats, D. Heurtaux, P. Horcajada, C. Serre, J.-S. Chang, G. Férey, V. A. De la Peña-O'Shea, C. Boissière, D. Grosso, C. Sanchez, *Eur. J. Inorg. Chem.* **2012**, 5165.

<sup>17</sup> T. B. Čelič, M. Rangus, K. Lázár, V. Kaučič, N. Z Logar. *Angew. Chem. Int. Edit.* **2012**, 51, 12490.
